# Supplementary material
Source: HighWire-hosted journal article supplement (https://www.annfammed.org/highwire/filestream/8974/field_highwire_adjunct_files/0/Pinto_Supp_Apps_1-3.pdf)
Supplement: Pinto_Supp_Apps_1-3.pdf [file Pinto_Supp_Apps_1-3.pdf]

## Employment interventions in health settings: systematic review and synthesis – Appendix 1

### Supplemental materials for:

Pinto AD, Hassen N, Craig-Neil A. Employment interventions in health settings: a systematic review and synthesis. *Ann Fam Med*. 2018;16(5):447-460.

### Supplemental Appendix 1: Literature search strategy

Database: Ovid MEDLINE(R) <1946 to November Week 1 2014>, Ovid MEDLINE(R) In-Process & Other Non-Indexed Citations <November 18, 2014>

Search Strategy:

- 
- 1 employment advice.tw. (5)
  - 2 employment adviser\*.tw. (3)
  - 3 employment advisor\*.tw. (2)
  - 4 employment intervention\*.tw. (32)
  - 5 Employment rehabilitation.tw. (22)
  - 6 employment specialist\*.tw. (56)
  - 7 employability intervention\*.tw. (1)
  - 8 gain work.tw. (9)
  - 9 gain employment.tw. (31)
  - 10 (Individual Placement adj2 Support).tw. (152)
  - 11 job-seeking abilit\*.tw. (1)
  - 12 supported employment.tw. (529)
  - 13 supported job\*.tw. (6)
  - 14 Vocational advice.tw. (11)
  - 15 vocational case management\*.tw. (5)
  - 16 vocational guidance.tw. (174)
  - 17 vocational service\*.tw. (183)
  - 18 vocational advise\*.tw. (2)
  - 19 vocational advisor\*.tw. (2)
  - 20 vocational intervention\*.tw. (67)
  - 21 vocational specialist\*.tw. (17)
  - 22 Vocational Guidance/ (1959)
  - 23 exp Rehabilitation, Vocational/ (9312)
  - 24 Employment, Supported/ (880)
  - 25 or/1-24 (11447)

## Employment interventions in health settings: systematic review and synthesis – Appendix 1

- 26 exp clinical trial/ (816143)
- 27 exp case-control studies/ or exp cohort studies/ or cross-sectional studies/ or feasibility studies/ or intervention studies/ or pilot projects/ (1841639)
- 28 exp Clinical Trials as Topic/ (294598)
- 29 Comparative Study/ (1730659)
- 30 evaluation studies/ or multicenter study/ or validation studies/ (448840)
- 31 Cost-Benefit Analysis/ (63115)
- 32 interviews as topic/ or focus groups/ or exp questionnaires/ (378298)
- 33 exp "Outcome Assessment (Health Care)"/ (745465)
- 34 Program Evaluation/ (48168)
- 35 qualitative research/ (22312)
- 36 exp Research Design/ (354338)
- 37 control groups/ or cross-over studies/ or double-blind method/ or single-blind method/ (174591)
- 38 employment outcome\*.tw. (498)
- 39 vocational outcome\*.tw. (243)
- 40 or/26-39 (4645031)
- 41 25 and 40 (3438)
- 42 limit 25 to (meta analysis or systematic reviews) (250)
- 43 41 or 42 (3553)
- 44 limit 43 to (comment or editorial or letter or news) (54)
- 45 43 not 44 (3499)
- 46 limit 45 to yr="1995 -Current" (2466)
- 47 remove duplicates from 46 (2346)

\*\*\*\*\*

### PubMed (for non-Medline records)

149 results

((("employment advice"[TIAB] OR "employment adviser"[TIAB] OR "employment advisers"[TIAB] OR "employment advisor"[TIAB] OR "employment advisors"[TIAB] OR "employment intervention"[TIAB] OR "employment interventions"[TIAB] OR "Employment rehabilitation"[TIAB] OR "employment specialist"[TIAB] OR "employment specialists"[TIAB] OR "employability intervention"[TIAB] OR "employability interventions"[TIAB] OR "gain work"[TIAB] OR "gain employment"[TIAB] OR "job-seeking ability"[TIAB] OR "job-seeking abilities"[TIAB] OR "supported employment"[TIAB] OR "supported job"[TIAB] OR "supported jobs"[TIAB] OR "Vocational advice"[TIAB] OR "vocational case management"[TIAB] OR "vocational case manager"[TIAB] OR "vocational case managers"[TIAB] OR "vocational

## Employment interventions in health settings: systematic review and synthesis – Appendix 1

guidance"[TIAB] OR "vocational service"[TIAB] OR "vocational services"[TIAB] OR "vocational adviser"[TIAB] OR "vocational advisers"[TIAB] OR "vocational advisor"[TIAB] OR "vocational advisors"[TIAB] OR "vocational intervention"[TIAB] OR "vocational interventions"[TIAB] OR "vocational specialist"[TIAB] OR "vocational specialists"[TIAB] OR "Vocational Rehabilitation"[TIAB])) AND ((publisher[sb] OR pubmednotmedline[sb])) Filters: Publication date from 1995/01/01

### Database: Embase <1980 to 2014 Week 46>

#### Search Strategy:

- 
- 1 employment advice.tw. (7)
  - 2 employment adviser\*.tw. (4)
  - 3 employment advisor\*.tw. (4)
  - 4 employment intervention\*.tw. (50)
  - 5 Employment rehabilitation.tw. (25)
  - 6 employment specialist\*.tw. (81)
  - 7 employability intervention\*.tw. (1)
  - 8 gain work.tw. (10)
  - 9 gain employment.tw. (43)
  - 10 (Individual Placement adj2 Support).tw. (204)
  - 11 job-seeking abilit\*.tw. (1)
  - 12 supported employment.tw. (775)
  - 13 supported job\*.tw. (9)
  - 14 Vocational advice.tw. (11)
  - 15 vocational case management\*.tw. (4)
  - 16 vocational guidance.tw. (181)
  - 17 vocational service\*.tw. (236)
  - 18 vocational advise\*.tw. (3)
  - 19 vocational advisor\*.tw. (2)
  - 20 vocational intervention\*.tw. (89)
  - 21 vocational specialist\*.tw. (20)
  - 22 vocational guidance/ (2235)
  - 23 vocational rehabilitation/ (7811)
  - 24 supported employment.tw. (775)
  - 25 or/1-24 (10535)

## Employment interventions in health settings: systematic review and synthesis – Appendix 1

- 26 limit 25 to (clinical trial or randomized controlled trial or controlled clinical trial or multicenter study or phase 1 clinical trial or phase 2 clinical trial or phase 3 clinical trial or phase 4 clinical trial) (390)
- 27 limit 25 to outcomes research (179)
- 28 limit 27 to (evidence based medicine or meta analysis or "systematic review") (19)
- 29 exp clinical study/ (6341108)
- 30 cohort analysis/ (181153)
- 31 exp program evaluation/ (3185)
- 32 "cost benefit analysis"/ (65017)
- 33 "cost effectiveness analysis"/ (100869)
- 34 qualitative research/ (27374)
- 35 exp interview/ (158894)
- 36 exp questionnaire/ (415565)
- 37 outcome assessment/ (254627)
- 38 action research/ or comparative study/ or exp controlled study/ or experimental study/ or feasibility study/ or observational study/ or pilot study/ or validation study/ (5267645)
- 39 control group/ or correlational study/ or cross-sectional study/ or crossover procedure/ or double blind procedure/ or grounded theory/ or multimethod study/ or participatory research/ or single blind procedure/ (364324)
- 40 comparative effectiveness/ (11943)
- 41 employment outcome\*.tw. (640)
- 42 vocational outcome\*.tw. (330)
- 43 or/29-42 (10156789)
- 44 25 and 43 (3526)
- 45 26 or 27 or 28 or 44 (3582)
- 46 limit 45 to (editorial or letter) (67)
- 47 45 not 46 (3515)
- 48 limit 47 to yr="1995 -Current" (2828)
- 49 limit 48 to embase (2165)
- 50 remove duplicates from 49 (2162)

\*\*\*\*\*

**Database: EBM Reviews - Cochrane Database of Systematic Reviews <2005 to October 2014>, EBM Reviews - ACP Journal Club <1991 to October 2014>, EBM Reviews - Database of Abstracts of Reviews of Effects <4th Quarter 2014>, EBM Reviews - Cochrane Central Register of Controlled Trials <October 2014>, EBM Reviews - Cochrane Methodology Register <3rd Quarter 2012>, EBM Reviews - Health Technology Assessment <4th Quarter 2014>, EBM Reviews - NHS Economic Evaluation Database <4th Quarter 2014>**  
Search Strategy:

## Employment interventions in health settings: systematic review and synthesis – Appendix 1

- 
- 1 employment advice.tw. (0)
  - 2 employment adviser\*.tw. (1)
  - 3 employment advisor\*.tw. (0)
  - 4 employment intervention\*.tw. (20)
  - 5 Employment rehabilitation.tw. (2)
  - 6 employment specialist\*.tw. (12)
  - 7 employability intervention\*.tw. (1)
  - 8 gain work.tw. (2)
  - 9 gain employment.tw. (5)
  - 10 (Individual Placement adj2 Support).tw. (70)
  - 11 job-seeking abilit\*.tw. (0)
  - 12 supported employment.tw. (103)
  - 13 supported job\*.tw. (1)
  - 14 Vocational advice.tw. (4)
  - 15 vocational case management\*.tw. (2)
  - 16 vocational guidance.tw. (8)
  - 17 vocational service\*.tw. (43)
  - 18 vocational advise\*.tw. (0)
  - 19 vocational advisor\*.tw. (1)
  - 20 vocational intervention\*.tw. (30)
  - 21 vocational specialist\*.tw. (2)
  - 22 Vocational Guidance/ (27)
  - 23 exp Rehabilitation, Vocational/ (317)
  - 24 Employment, Supported/ (64)
  - 25 1 or 2 or 3 or 4 or 5 or 6 or 7 or 8 or 9 or 10 or 11 or 12 or 13 or 14 or 15 or 16 or 17 or 18 or 19 or 20 or 21 or 22 or 23 or 24 (455)
  - 26 remove duplicates from 25 (454)
  - 27 limit 26 to yr="1995 -Current" [Limit not valid in DARE; records were retained] (398)

\*\*\*\*\*

**Interface - EBSCOhost Research Databases**  
**Database - CINAHL**

| #   | Query      | Limiters/Expanders            | Results |
|-----|------------|-------------------------------|---------|
| S22 | S19 OR S21 | Search modes - Boolean/Phrase | 1,248   |

## Employment interventions in health settings: systematic review and synthesis – Appendix 1

|     |                                                                                                                                                                                                                                                                                     |                                                                                     |         |
|-----|-------------------------------------------------------------------------------------------------------------------------------------------------------------------------------------------------------------------------------------------------------------------------------------|-------------------------------------------------------------------------------------|---------|
| S21 | S18 AND S20                                                                                                                                                                                                                                                                         | Limiters - Published Date:<br>19950101-20151231<br>Search modes -<br>Boolean/Phrase | 251     |
| S20 | (MH "Rehabilitation, Vocational/AM/EV/MT/OG/TD/UT") OR (MH "Job Re-Entry/AM/MT/UT")                                                                                                                                                                                                 | Search modes -<br>Boolean/Phrase                                                    | 622     |
| S19 | S6 AND S18                                                                                                                                                                                                                                                                          | Limiters - Published Date:<br>19950101-20151231<br>Search modes -<br>Boolean/Phrase | 1,135   |
| S18 | S7 OR S8 OR S9 OR S10 OR S11 OR S12 OR S13 OR S14 OR S15 OR S16 OR S17                                                                                                                                                                                                              | Search modes -<br>Boolean/Phrase                                                    | 635,691 |
| S17 | (MH "Meta Analysis")                                                                                                                                                                                                                                                                | Search modes -<br>Boolean/Phrase                                                    | 15,067  |
| S16 | (MH "Systematic Review")                                                                                                                                                                                                                                                            | Search modes -<br>Boolean/Phrase                                                    | 19,946  |
| S15 | vocational outcome*                                                                                                                                                                                                                                                                 | Search modes -<br>Boolean/Phrase                                                    | 158     |
| S14 | employment outcome*                                                                                                                                                                                                                                                                 | Search modes -<br>Boolean/Phrase                                                    | 494     |
| S13 | (MH "Outcome Assessment") OR (MH "Outcomes Research")                                                                                                                                                                                                                               | Search modes -<br>Boolean/Phrase                                                    | 22,457  |
| S12 | (MH "Outcome Assessment")                                                                                                                                                                                                                                                           | Search modes -<br>Boolean/Phrase                                                    | 17,281  |
| S11 | (MH "Cost Benefit Analysis")                                                                                                                                                                                                                                                        | Search modes -<br>Boolean/Phrase                                                    | 14,048  |
| S10 | (MH "Program Evaluation") OR (MH "Formative Evaluation Research") OR (MH "Summative Evaluation Research") OR (MH "Multicenter Studies") OR (MH "Action Research") OR (MH "Applied Research") OR (MH "Comparative Studies") OR (MH "Descriptive Research") OR (MH "Grounded Theory") | Search modes -<br>Boolean/Phrase                                                    | 151,799 |

## Employment interventions in health settings: systematic review and synthesis – Appendix 1

|    |                                                                                                                                                                                                                                                                                                                                                                                                                                                                                                                                                                                                                                                                                                                                                                                                                                                                                                                                                 |                                  |         |
|----|-------------------------------------------------------------------------------------------------------------------------------------------------------------------------------------------------------------------------------------------------------------------------------------------------------------------------------------------------------------------------------------------------------------------------------------------------------------------------------------------------------------------------------------------------------------------------------------------------------------------------------------------------------------------------------------------------------------------------------------------------------------------------------------------------------------------------------------------------------------------------------------------------------------------------------------------------|----------------------------------|---------|
| S9 | (MH "Evaluation Research+")                                                                                                                                                                                                                                                                                                                                                                                                                                                                                                                                                                                                                                                                                                                                                                                                                                                                                                                     | Search modes -<br>Boolean/Phrase | 18,420  |
| S8 | (MH "Nonexperimental Studies+") OR (MH "Qualitative Studies+") OR (MH "Experimental Studies+") OR (MH "Quantitative Studies") OR (MH "Quasi-Experimental Studies+") OR (MH "Interviews+") OR (MH "Focus Groups") OR (MH "Health Impact Assessment") OR (MH "Naturalistic Inquiry") OR (MH "Crossover Design")                                                                                                                                                                                                                                                                                                                                                                                                                                                                                                                                                                                                                                   | Search modes -<br>Boolean/Phrase | 518,004 |
| S7 | (MH "Clinical Trials+")                                                                                                                                                                                                                                                                                                                                                                                                                                                                                                                                                                                                                                                                                                                                                                                                                                                                                                                         | Search modes -<br>Boolean/Phrase | 124,320 |
| S6 | S1 OR S2 OR S3                                                                                                                                                                                                                                                                                                                                                                                                                                                                                                                                                                                                                                                                                                                                                                                                                                                                                                                                  | Search modes -<br>Boolean/Phrase | 2,603   |
| S5 | (MH "Rehabilitation, Vocational")                                                                                                                                                                                                                                                                                                                                                                                                                                                                                                                                                                                                                                                                                                                                                                                                                                                                                                               | Search modes -<br>Boolean/Phrase | 4,322   |
| S4 | MH "Job Re-Entry"                                                                                                                                                                                                                                                                                                                                                                                                                                                                                                                                                                                                                                                                                                                                                                                                                                                                                                                               | Search modes -<br>Boolean/Phrase | 3,823   |
| S3 | (MH "Vocational Guidance")                                                                                                                                                                                                                                                                                                                                                                                                                                                                                                                                                                                                                                                                                                                                                                                                                                                                                                                      | Search modes -<br>Boolean/Phrase | 280     |
| S2 | (MH "Employment, Supported")                                                                                                                                                                                                                                                                                                                                                                                                                                                                                                                                                                                                                                                                                                                                                                                                                                                                                                                    | Search modes -<br>Boolean/Phrase | 564     |
| S1 | "employment advice" OR "employment adviser" OR "employment advisers" OR "employment advisor" OR "employment advisors" OR "employment intervention" OR "employment interventions" OR "Employment rehabilitation" OR "employment specialist" OR "employment specialists" OR "employability intervention" OR "employability interventions" OR "gain work" OR "gain employment" OR "job-seeking ability" OR "job-seeking abilities" OR "supported employment" OR "supported job" OR "supported jobs" OR "Vocational advice" OR "vocational case management" OR "vocational case manager" OR "vocational case managers" OR "vocational guidance" OR "vocational service" OR "vocational services" OR "vocational adviser" OR "vocational advisers" OR "vocational advisor" OR "vocational advisors" OR "vocational intervention" OR "vocational interventions" OR "vocational specialist" OR "vocational specialists" OR "Vocational Rehabilitation" | Search modes -<br>Boolean/Phrase | 2,331   |

### Scopus

## Employment interventions in health settings: systematic review and synthesis – Appendix 1

1446 results

TITLE-ABS-KEY ( "employment advice" OR "employment adviser" OR "employment advisers" OR "employment advisor" OR "employment advisors" OR "employment intervention" OR "employment interventions" OR "Employment rehabilitation" OR "employment specialist" OR "employment specialists" OR "employability intervention" OR "employability interventions" OR "gain work" OR "gain employment" OR "job-seeking ability" OR "job-seeking abilities" OR "supported employment" OR "supported job" OR "supported jobs" OR "Vocational advice" OR "vocational case management" OR "vocational case manager" OR "vocational case managers" OR "vocational guidance" OR "vocational service" OR "vocational services" OR "vocational adviser" OR "vocational advisers" OR "vocational advisor" OR "vocational advisors" OR "vocational intervention" OR "vocational interventions" OR "vocational specialist" OR "vocational specialists" ) AND SUBJAREA ( mult OR medi OR nurs OR heal OR arts OR psyc OR soci ) AND PUBYEAR > 1994 AND ( EXCLUDE ( DOCTYPE , "ed" ) OR EXCLUDE ( DOCTYPE , "no" ) OR EXCLUDE ( DOCTYPE , "sh" ) OR EXCLUDE ( DOCTYPE , "le" ) ) AND ( EXCLUDE ( EXACTKEYWORD , "Adolescent" ) OR EXCLUDE ( EXACTKEYWORD , "Education" ) OR EXCLUDE ( EXACTKEYWORD , "Career Choice" ) OR EXCLUDE ( EXACTKEYWORD , "Job performance" ) )

### Databases: ProQuest Dissertations & Theses Global

Results: 482°

Searched for: ab("employment advice" OR "employment adviser" OR "employment advisers" OR "employment advisor" OR "employment advisors" OR "employment intervention" OR "employment interventions" OR "Employment rehabilitation" OR "employment specialist" OR "employment specialists" OR "employability intervention" OR "employability interventions" OR "gain work" OR "gain employment" OR "job-seeking ability" OR "job-seeking abilities" OR "supported employment" OR "supported job" OR "supported jobs" OR "Vocational advice" OR "vocational case management" OR "vocational case manager" OR "vocational case managers" OR "vocational guidance" OR "vocational service" OR "vocational services" OR "vocational adviser" OR "vocational advisers" OR "vocational advisor" OR "vocational advisors" OR "vocational intervention" OR "vocational interventions" OR "vocational specialist" OR "vocational specialists" OR "Vocational Rehabilitation") OR ti("employment advice" OR "employment adviser" OR "employment advisers" OR "employment advisor" OR "employment advisors" OR "employment intervention" OR "employment interventions" OR "Employment rehabilitation" OR "employment specialist" OR "employment specialists" OR "employability intervention" OR "employability interventions" OR "gain work" OR "gain employment" OR "job-seeking ability" OR "job-seeking abilities" OR "supported employment" OR "supported job" OR "supported jobs" OR "Vocational advice" OR "vocational case management" OR "vocational case manager" OR "vocational case managers" OR "vocational guidance" OR "vocational service" OR "vocational services" OR "vocational adviser" OR "vocational advisers" OR "vocational advisor" OR "vocational advisors" OR "vocational intervention" OR "vocational interventions" OR "vocational specialist" OR "vocational specialists" OR "Vocational Rehabilitation") AND pd(>19951231)

### Theses Canada Portal

<http://www.collectionscanada.gc.ca/thesescanada/index-e.html>



## Employment interventions in health settings: systematic review and synthesis – Appendix 1

Note: No phrase search possibility, all phrase searches were automatically combined with Boolean operator “AND”

17 results selected

### **Title keyword searches:**

employment advice  
employment adviser  
employment advisers  
employment advisor  
employment advisors  
employment intervention  
employment interventions  
gain work  
gain employment  
supported employment  
Vocational advice  
vocational case management  
vocational guidance  
vocational intervention  
vocational interventions  
vocational specialist  
vocational specialists  
Vocational Rehabilitation  
unemployed

### **Abstract Keywords:**

Vocational Rehabilitation  
employment advice  
employment intervention

## Employment interventions in health settings: systematic review and synthesis – Appendix 1

### Supplemental Appendix 2: Studies examining employment interventions in health settings

| Full citation           | Country       | Patient group                  | Age group             | Setting                        | Year of intervention (start) | Intervention                                                                                                        | Control/ Comparison or not (Y/N)     | Number of participants (Control) | Number of participants in intervention 1 | Number of participants in intervention 2 | Number of participants in intervention 3 | Quantified Outcome (main)                                                                                                                                                                       | Success?  | Observational or Experimental | Study Design       | Total rigor score (1-9) |
|-------------------------|---------------|--------------------------------|-----------------------|--------------------------------|------------------------------|---------------------------------------------------------------------------------------------------------------------|--------------------------------------|----------------------------------|------------------------------------------|------------------------------------------|------------------------------------------|-------------------------------------------------------------------------------------------------------------------------------------------------------------------------------------------------|-----------|-------------------------------|--------------------|-------------------------|
| (Alverson et al., 1995) | United States | Mental Illness                 | Late 20s to early 60s | Community mental health centre | Unknown                      | <b>Supported Employment</b> : Individual Placement and Support (IPS)                                                | No                                   | N/A                              | 13                                       | N/A                                      | N/A                                      | 77% of participants obtained at least one competitive job                                                                                                                                       | Yes       | Observational                 | Prospective Cohort | 3                       |
| (Au et al., 2015)       | Hong Kong     | Mental Illness (Schizophrenia) | 18 or older           | Psychiatric outpatient service | 2011                         | <b>Supported Employment (adapted program)</b> : Integrated Supported Employment plus Cognitive Remediation Training | Yes: Integrated Supported Employment | 45                               | 45                                       | N/A                                      | N/A                                      | <u>At 11 month follow-up</u> : 44.4% of ISE + CRT participants and 55.6% of ISE participants successfully obtained competitive employment but no between group significant difference was found | Promising | Experimental                  | RCT                | N/A                     |

## Employment interventions in health settings: systematic review and synthesis – Appendix 1

| Full citation         | Country       | Patient group  | Age group                            | Setting                                                | Year of intervention (start) | Intervention                                                                                                           | Control/ Comparison or not (Y/N) | Number of participants (Control) | Number of participants in intervention 1                           | Number of participants in intervention 2 | Number of participants in intervention 3 | Quantified Outcome (main)                                                                                                                     | Success? | Observational or Experimental | Study Design                                      | Total rigor score (1-9) |
|-----------------------|---------------|----------------|--------------------------------------|--------------------------------------------------------|------------------------------|------------------------------------------------------------------------------------------------------------------------|----------------------------------|----------------------------------|--------------------------------------------------------------------|------------------------------------------|------------------------------------------|-----------------------------------------------------------------------------------------------------------------------------------------------|----------|-------------------------------|---------------------------------------------------|-------------------------|
| (Becker et al., 2007) | United States | Mental Illness | Unknown : mean age of about 49 years | Community mental health centre                         | 1990                         | <b>Supported Employment</b> : IPS                                                                                      | No                               | N/A                              | 38                                                                 | N/A                                      | N/A                                      | 100% worked during the follow-up period, a great majority (82%) in competitive jobs, and 71% worked for more than half of the follow-up years | Yes      | Observational                 | Retrospective Cohort                              | 2                       |
| (Becker et al., 2001) | United States | Mental Illness | 18-64                                | Community mental health centres                        | 1999                         | <b>Supported Employment</b> (program not specified)                                                                    | No                               | N/A                              | Total n = 2,639<br>Over 10 programs, largest = 533; smallest = 91. | N/A                                      | N/A                                      | Rate of competitive employment ranged from 14.4 % to 26.4 %                                                                                   | Yes      | Observational                 | Prospective cohort                                | 1                       |
| (Becker et al., 1999) | United States | Mental Illness | Unknown : mean age of about 33 years | Unknown health care setting (Referrals from hospitals) | 1984                         | <b>Integrated medical and vocational:</b> Psychosocial and vocational rehabilitation program modeled after the Program | No                               | N/A                              | 184                                                                | N/A                                      | N/A                                      | 63.7% who were enrolled in program for a year or longer were employed at some                                                                 | Yes      | Observational                 | Retrospective cohort (Secondary Analysis of Data) | 1                       |

## Employment interventions in health settings: systematic review and synthesis – Appendix 1

| Full citation            | Country       | Patient group                        | Age group | Setting                                | Year of intervention (start) | Intervention                                        | Control/ Comparison or not (Y/N)                                                     | Number of participants (Control) | Number of participants in intervention 1 | Number of participants in intervention 2 | Number of participants in intervention 3 | Quantified Outcome (main)                                                                                                                     | Success? | Observational or Experimental | Study Design | Total rigor score (1-9) |
|--------------------------|---------------|--------------------------------------|-----------|----------------------------------------|------------------------------|-----------------------------------------------------|--------------------------------------------------------------------------------------|----------------------------------|------------------------------------------|------------------------------------------|------------------------------------------|-----------------------------------------------------------------------------------------------------------------------------------------------|----------|-------------------------------|--------------|-------------------------|
|                          |               |                                      |           |                                        |                              | for Assertive Community Treatment (ACT)             |                                                                                      |                                  |                                          |                                          |                                          | time during their enrollment compared with 11.5% who were enrolled for less than one year. Over 10 years, the average employment rate was 33% |          |                               |              |                         |
| (Becker et al., 1996)    | United States | Mental Illness                       | 20 - 65   | Community mental health centres        | Unknown                      | <b>Supported Employment</b> : IPS                   | Yes: pre-employment skills training program followed by individualized job supports. | 69                               | 74                                       | N/A                                      | N/A                                      | 60% of clients (84 of 140) who completed the study held at least one competitive job                                                          | Yes      | Experimental                  | RCT          | N/A                     |
| (Bejerholm et al., 2017) | Sweden        | Mental Illness (affective disorders) | 18-63     | Four geographically diverse outpatient | 2011                         | <b>Other:</b> Individual Enabling and Support model | Yes: Traditional vocational                                                          | 28                               | 33                                       | N/A                                      | N/A                                      | <u>At 12-month follow-up:</u> 42.4% of                                                                                                        | Yes      | Experimental                  | RCT          | N/A                     |

## Employment interventions in health settings: systematic review and synthesis – Appendix 1

| Full citation            | Country       | Patient group                                              | Age group | Setting                                 | Year of intervention (start) | Intervention                                                                  | Control/ Comparison or not (Y/N)    | Number of participants (Control) | Number of participants in intervention 1 | Number of participants in intervention 2 | Number of participants in intervention 3 | Quantified Outcome (main)                                                                             | Success?                             | Observational or Experimental | Study Design                         | Total rigor score (1-9) |
|--------------------------|---------------|------------------------------------------------------------|-----------|-----------------------------------------|------------------------------|-------------------------------------------------------------------------------|-------------------------------------|----------------------------------|------------------------------------------|------------------------------------------|------------------------------------------|-------------------------------------------------------------------------------------------------------|--------------------------------------|-------------------------------|--------------------------------------|-------------------------|
|                          |               |                                                            |           | nt settings                             |                              |                                                                               | rehabilitation                      |                                  |                                          |                                          |                                          | IES-participants were competitively employed, while 4% of TVR-participants reached their working goal |                                      |                               |                                      |                         |
| (Bejerholm et al., 2015) | Sweden        | Mental Illness                                             | 18-63     | Six mental health teams covering a city | 2008                         | <b>Supported Employment</b> : IPS                                             | Yes: Traditional vocational service | 60                               | 60                                       | N/A                                      | N/A                                      | 46% in intervention vs. 11% in control for gaining competitive employment                             | Yes                                  | Experimental                  | RCT                                  | N/A                     |
| (Bell et al., 2014)      | United States | Mental Illness (Schizophrenia or schizoaffective disorder) | Unknown   | Community mental health centre          | 2001                         | <b>Supported Employment (adapted program):</b> IPS plus cognitive remediation | Yes: Supported employment           | 75                               | 99                                       | N/A                                      | N/A                                      | <u>For low-functioning participants:</u> 49% in intervention vs. 20% in control for                   | Yes for low-functioning participants | Experimental                  | RCT (secondary analysis of two RCTs) | N/A                     |

## Employment interventions in health settings: systematic review and synthesis – Appendix 1

| Full citation                  | Country       | Patient group  | Age group | Setting                        | Year of intervention (start) | Intervention                                                                                                            | Control/ Comparison or not (Y/N)                               | Number of participants (Control) | Number of participants in intervention 1 | Number of participants in intervention 2 | Number of participants in intervention 3 | Quantified Outcome (main)                                                                                | Success? | Observational or Experimental | Study Design | Total rigor score (1-9) |
|--------------------------------|---------------|----------------|-----------|--------------------------------|------------------------------|-------------------------------------------------------------------------------------------------------------------------|----------------------------------------------------------------|----------------------------------|------------------------------------------|------------------------------------------|------------------------------------------|----------------------------------------------------------------------------------------------------------|----------|-------------------------------|--------------|-------------------------|
|                                |               |                |           |                                |                              |                                                                                                                         |                                                                |                                  |                                          |                                          |                                          | Employment rates for high-functioning participants: equivalent rates of employment (62% versus 54%, ns). |          |                               |              |                         |
| (Bell et al., 2008)            | United States | Mental Illness | 29- 51    | Community mental health centre | 1998                         | <b>Integrated medical and vocational:</b> Neurocognitive enhancement therapy (NET) plus vocational rehabilitation (VOC) | Yes: Vocational program only                                   | 34                               | 38                                       | N/A                                      | N/A                                      | By 8 <sup>th</sup> quarter: 44.7% in intervention vs. 23.5% in control were working                      | Yes      | Experimental                  | RCT          | N/A                     |
| (Blankertz and Robinson, 1996) | United States | Mental Illness | 18-48     | Community mental health centre | 1994                         | <b>Other:</b> Employment specialist                                                                                     | Yes: community mental health services with no vocational focus | 61                               | 61                                       | N/A                                      | N/A                                      | 56% of intervention vs. 2% (1 person) in control achieved positive changes in                            | Yes      | Experimental                  | RCT          |                         |

## Employment interventions in health settings: systematic review and synthesis – Appendix 1

| Full citation       | Country       | Patient group  | Age group   | Setting                           | Year of intervention (start) | Intervention                                          | Control/ Comparison or not (Y/N)       | Number of participants (Control)                                  | Number of participants in intervention 1                            | Number of participants in intervention 2 | Number of participants in intervention 3 | Quantified Outcome (main)                                                                                           | Success? | Observational or Experimental | Study Design                     | Total rigor score (1-9) |
|---------------------|---------------|----------------|-------------|-----------------------------------|------------------------------|-------------------------------------------------------|----------------------------------------|-------------------------------------------------------------------|---------------------------------------------------------------------|------------------------------------------|------------------------------------------|---------------------------------------------------------------------------------------------------------------------|----------|-------------------------------|----------------------------------|-------------------------|
|                     |               |                |             |                                   |                              |                                                       |                                        |                                                                   |                                                                     |                                          |                                          | employment status including competitive employment                                                                  |          |                               |                                  |                         |
| (Bond et al., 2015) | United States | Mental Illness | 18 or older | Psychiatric rehabilitation agency | 2011                         | <b>Supported Employed:</b> IPS                        | Yes: Work Choice - a job club approach | 43                                                                | 44                                                                  | N/A                                      | N/A                                      | <u>Over the 12-months:</u> 31% of IPS participants versus 7% of Work Choice participants obtained a competitive job | Yes      | Experimental                  | RCT                              | N/A                     |
| (Bond et al., 2013) | United States | Mental Illness | 18 or older | Psychiatric Rehabilitation Agency | Unknown                      | <b>Other:</b> Job matching (through both IPS and DPA) | Yes: mismatched group                  | Paid employment matched: 54<br>Competitive employment matched: 35 | Paid employment matched : 80<br>Competitive employment matched : 51 | N/A                                      | N/A                                      | <b>Paid employment:</b> Days to employment for matched 150.74 (135.12) and mismatched 163.44 (149.33)               | No       | Experimental                  | RCT (Secondary Analysis of Data) | N/A                     |

## Employment interventions in health settings: systematic review and synthesis – Appendix 1

| Full citation       | Country       | Patient group                    | Age group   | Setting                                                 | Year of intervention (start) | Intervention                      | Control/ Comparison or not (Y/N)     | Number of participants (Control) | Number of participants in intervention 1 | Number of participants in intervention 2 | Number of participants in intervention 3 | Quantified Outcome (main)                                                                                                                                                             | Success? | Observational or Experimental | Study Design                        | Total rigor score (1-9) |
|---------------------|---------------|----------------------------------|-------------|---------------------------------------------------------|------------------------------|-----------------------------------|--------------------------------------|----------------------------------|------------------------------------------|------------------------------------------|------------------------------------------|---------------------------------------------------------------------------------------------------------------------------------------------------------------------------------------|----------|-------------------------------|-------------------------------------|-------------------------|
|                     |               |                                  |             |                                                         |                              |                                   |                                      |                                  |                                          |                                          |                                          | were not statistically significant<br><b>Competitive employment:</b> Days to employment for matched 149.35 (120.44) and mismatched 165.97 (144.75) were not statistically significant |          |                               |                                     |                         |
| (Bond et al., 2014) | United States | Young Adults with Mental Illness | 20 - 29     | Mental health agency and community mental health centre | Unknown                      | <b>Supported Employment</b> : IPS | Yes: alternative vocational services | 60                               | 49                                       | N/A                                      | N/A                                      | 82% in intervention vs.42% in control were competitively employed                                                                                                                     | Yes      | Experimental                  | 4 RCTs (Secondary Analysis of Data) | N/A                     |
| (Bond et al., 2007) | United States | Mental Illness                   | 18 or older | Psychiatric rehabilitation agency                       | 1999                         | <b>Supported Employment</b> : IPS | Yes: Diversified Placement           | 95                               | 92                                       | N/A                                      | N/A                                      | In intervention, more than                                                                                                                                                            | Yes      | Experimental                  | RCT                                 | N/A                     |



Employment interventions in health settings: systematic review and synthesis – Appendix 1

| Full citation       | Country       | Patient group  | Age group | Setting                                                                         | Year of intervention (start) | Intervention                                                        | Control/ Comparison or not (Y/N)              | Number of participants (Control) | Number of participants in intervention 1 | Number of participants in intervention 2 | Number of participants in intervention 3 | Quantified Outcome (main)                                                                                                                                         | Success? | Observational or Experimental | Study Design | Total rigor score (1-9) |
|---------------------|---------------|----------------|-----------|---------------------------------------------------------------------------------|------------------------------|---------------------------------------------------------------------|-----------------------------------------------|----------------------------------|------------------------------------------|------------------------------------------|------------------------------------------|-------------------------------------------------------------------------------------------------------------------------------------------------------------------|----------|-------------------------------|--------------|-------------------------|
|                     |               |                |           |                                                                                 |                              |                                                                     | Approach (DPA)                                |                                  |                                          |                                          |                                          | twice the percentage in intervention was likely to work competitively compared to control. 75% in intervention vs. 33.7% in control gained competitive employment |          |                               |              |                         |
| (Bond et al., 1995) | United States | Mental Illness | 18-60     | Community mental health centre (3 sites), integrated mental health/V R (1 site) | 1989                         | <b>Supported Employment (adapted program):</b> Accelerated Approach | Yes: Gradual Approach to supported employment | 43                               | 43                                       | N/A                                      | N/A                                      | 43% were employed at least once. <u>Year 1:</u> 56% in intervention vs. 29% in control obtained competitive employment                                            | Yes      | Experimental                  | RCT          | N/A                     |

## Employment interventions in health settings: systematic review and synthesis – Appendix 1

| Full citation        | Country | Patient group  | Age group | Setting                        | Year of intervention (start) | Intervention                                                 | Control/ Comparison or not (Y/N)          | Number of participants (Control) | Number of participants in intervention 1 | Number of participants in intervention 2 | Number of participants in intervention 3 | Quantified Outcome (main)                                                                                                                                | Success?  | Observational or Experimental | Study Design       | Total rigor score (1-9) |
|----------------------|---------|----------------|-----------|--------------------------------|------------------------------|--------------------------------------------------------------|-------------------------------------------|----------------------------------|------------------------------------------|------------------------------------------|------------------------------------------|----------------------------------------------------------------------------------------------------------------------------------------------------------|-----------|-------------------------------|--------------------|-------------------------|
|                      |         |                |           |                                |                              |                                                              |                                           |                                  |                                          |                                          |                                          | at some time during the year <u>Over 3 years later:</u> 59% in intervention vs. 6% in control were competitively employed                                |           |                               |                    |                         |
| (Bowie et al., 2016) | Canada  | Mental Illness | 18-65     | Community mental health agency | Unknown                      | <b>Developed program:</b> Action based cognitive remediation | Yes: Traditional cognitive rehabilitation | 26                               | 24                                       | N/A                                      | N/A                                      | <u>6 months after treatment</u> : 13 participants (68.4%) of those retained in the ABCR group were employed in a competitive setting at least part-time. | Promising | Observational                 | Prospective Cohort | 7                       |

Employment interventions in health settings: systematic review and synthesis – Appendix 1

| Full citation        | Country        | Patient group  | Age group | Setting                       | Year of intervention (start) | Intervention                                                                          | Control/ Comparison or not (Y/N) | Number of participants (Control) | Number of participants in intervention 1 | Number of participants in intervention 2 | Number of participants in intervention 3 | Quantified Outcome (main)                                                                                                                                                  | Success? | Observational or Experimental | Study Design | Total rigor score (1-9) |
|----------------------|----------------|----------------|-----------|-------------------------------|------------------------------|---------------------------------------------------------------------------------------|----------------------------------|----------------------------------|------------------------------------------|------------------------------------------|------------------------------------------|----------------------------------------------------------------------------------------------------------------------------------------------------------------------------|----------|-------------------------------|--------------|-------------------------|
| (Burns et al., 2015) | United Kingdom | Mental illness | 18-65     | Community mental health teams | Unknown                      | <b>Supported Employment (adapted program):</b> IPS-LITE (support limited to 9 months) | Yes: Supported Employment (IPS)  | 61                               | 62                                       | N/A                                      | N/A                                      | 18 month follow-up: 51 patients (43%) who completed 18-month follow-up (n=118) obtained employment. Rates of employment were equal between groups at 18 months (IPS-LITE = | Yes      | Experimental                  | RCT          | N/A                     |

## Employment interventions in health settings: systematic review and synthesis – Appendix 1

| Full citation           | Country                                                                                      | Patient group     | Age group                                                       | Setting                                                                                                              | Year of intervention (start) | Intervention                      | Control/ Comparison or not (Y/N)                            | Number of participants (Control) | Number of participants in intervention 1 | Number of participants in intervention 2 | Number of participants in intervention 3 | Quantified Outcome (main)                                                                                                                                                                | Success? | Observational or Experimental | Study Design | Total rigor score (1-9) |
|-------------------------|----------------------------------------------------------------------------------------------|-------------------|-----------------------------------------------------------------|----------------------------------------------------------------------------------------------------------------------|------------------------------|-----------------------------------|-------------------------------------------------------------|----------------------------------|------------------------------------------|------------------------------------------|------------------------------------------|------------------------------------------------------------------------------------------------------------------------------------------------------------------------------------------|----------|-------------------------------|--------------|-------------------------|
|                         |                                                                                              |                   |                                                                 |                                                                                                                      |                              |                                   |                                                             |                                  |                                          |                                          |                                          | 24 (41%) and IPS = 27 (46%)                                                                                                                                                              |          |                               |              |                         |
| (Burns and Catty, 2008) | 6 European countries: United Kingdom, Germany, Italy, Switzerland, the Netherlands, Bulgaria | Psychotic illness | Unknown: mean age of about 38 years                             | Unknown healthcare setting. Full-time day center structured programs apart from Ulm in Germany which was residential | Unknown                      | <b>Supported Employment</b> : IPS | Yes: High quality train and place vocational rehabilitation | 156                              | 156                                      | N/A                                      | N/A                                      | 54.5% in intervention vs. 27.6% in control were able to return to open employment (working for at least one day) In intervention, 2 times more effective in returning to open employment | Yes      | Experimental                  | RCT          | N/A                     |
| (Burns et al., 2007)    | 6 European countries: United Kingdom, Germany                                                | Mental illness    | Between 18 and local retirement age (varying between 60 and 65) | Unknown healthcare setting (some operating out of community)                                                         | 2003                         | <b>Supported Employment</b> : IPS | Yes: Traditional vocational service                         | 156                              | 156                                      | N/A                                      | N/A                                      | 55% patients assigned to intervention worked for at least                                                                                                                                | Yes      | Experimental                  | RCT          | N/A                     |

## Employment interventions in health settings: systematic review and synthesis – Appendix 1

| Full citation        | Country                                           | Patient group                       | Age group                                                                                                                                                | Setting                        | Year of intervention (start) | Intervention                                                                                                                                                 | Control/ Comparison or not (Y/N)                     | Number of participants (Control) | Number of participants in intervention 1 | Number of participants in intervention 2 | Number of participants in intervention 3 | Quantified Outcome (main)                                                                                                          | Success? | Observational or Experimental | Study Design       | Total rigor score (1-9) |
|----------------------|---------------------------------------------------|-------------------------------------|----------------------------------------------------------------------------------------------------------------------------------------------------------|--------------------------------|------------------------------|--------------------------------------------------------------------------------------------------------------------------------------------------------------|------------------------------------------------------|----------------------------------|------------------------------------------|------------------------------------------|------------------------------------------|------------------------------------------------------------------------------------------------------------------------------------|----------|-------------------------------|--------------------|-------------------------|
|                      | ny, Italy, Switzerland, the Netherlands, Bulgaria |                                     |                                                                                                                                                          | mental health centres)         |                              |                                                                                                                                                              |                                                      |                                  |                                          |                                          |                                          | 1 day compared with 28% patients in control                                                                                        |          |                               |                    |                         |
| (Burt, 2012)         | United States                                     | Homeless adults with mental illness | 18 and over (unmatched/matched mean age of intervention group was 45.9 and unmatched mean age of control was 42 and matched mean age of control was 46.) | Community mental health centre | 2004                         | <b>Developed program:</b> Federally funded housing and employment demonstration program (Los Angeles' Homeless Opportunity Providing Employment [LA's HOPE]) | Yes: Other state funded programs to end homelessness | 415                              | 56                                       | N/A                                      | N/A                                      | 57% in intervention vs. 22% in control gained any employment. 27% in intervention vs. 13% in control gained competitive employment | Yes      | Observational                 | Prospective cohort | 6                       |
| (Chang et al., 2016) | Australia                                         | Mental Illness                      | 18-64                                                                                                                                                    | Community mental health agency | Unknown                      | <b>Supported Employment (adapted program):</b> Enhanced intersectoral links approach                                                                         | No                                                   | N/A                              | 67                                       | N/A                                      | N/A                                      | 63.3% of participants who completed the program achieved an employment                                                             | Yes      | Observational                 | Prospective Cohort | 3                       |

## Employment interventions in health settings: systematic review and synthesis – Appendix 1

| Full citation         | Country       | Patient group  | Age group         | Setting                         | Year of intervention (start) | Intervention                                                                                                      | Control/ Comparison or not (Y/N)     | Number of participants (Control) | Number of participants in intervention 1 | Number of participants in intervention 2 | Number of participants in intervention 3 | Quantified Outcome (main)                                                                                                                                                                       | Success? | Observational or Experimental | Study Design         | Total rigor score (1-9) |
|-----------------------|---------------|----------------|-------------------|---------------------------------|------------------------------|-------------------------------------------------------------------------------------------------------------------|--------------------------------------|----------------------------------|------------------------------------------|------------------------------------------|------------------------------------------|-------------------------------------------------------------------------------------------------------------------------------------------------------------------------------------------------|----------|-------------------------------|----------------------|-------------------------|
|                       |               |                |                   |                                 |                              |                                                                                                                   |                                      |                                  |                                          |                                          |                                          | placement                                                                                                                                                                                       |          |                               |                      |                         |
| (Chiu and Wong, 2001) | Hong Kong     | Mental Illness | 17-60             | Hospital                        | 1995                         | <b>Supported Employment</b>                                                                                       | No                                   | N/A                              | 388                                      | N/A                                      | N/A                                      | 31.2% obtained competitive employment                                                                                                                                                           | Yes      | Observational                 | Retrospective Cohort | 2                       |
| (Chuang et al., 2015) | Taiwan        | Mental Illness | 18-50 (mean 34.4) | Psychiatric Hospital            | Unknown                      | <b>Developed program:</b> ABC workshop - in hospital prevocational training program led by occupational therapist | No                                   | N/A                              | 58                                       | N/A                                      | N/A                                      | The overall employment rates among the participants were high: 79.3% at <u>one-month</u> , 67.2% at <u>three months</u> and 69% at <u>6 months</u> following the prevocational training program | Yes      | Observational                 | Retrospective Cohort | 1                       |
| (Cook et al., 2008)   | United States | Mental Illness | 18 or older       | Community mental health centres | 1995                         | <b>Supported Employment (adapted program):</b> Enhanced best practice                                             | Yes: 4 sites used Usual Care, 1 site | with schizophrenia and other     | with schizophrenia and intervention:     | N/A                                      | N/A                                      | In intervention, 3 and a half times                                                                                                                                                             | Yes      | Experimental                  | RCT                  | N/A                     |

## Employment interventions in health settings: systematic review and synthesis – Appendix 1

| Full citation        | Country       | Patient group  | Age group                            | Setting                                     | Year of intervention (start) | Intervention                                                                                                                                                                                             | Control/ Comparison or not (Y/N)                               | Number of participants (Control)            | Number of participants in intervention 1                  | Number of participants in intervention 2 | Number of participants in intervention 3 | Quantified Outcome (main)                                        | Success? | Observational or Experimental | Study Design | Total rigor score (1-9) |
|----------------------|---------------|----------------|--------------------------------------|---------------------------------------------|------------------------------|----------------------------------------------------------------------------------------------------------------------------------------------------------------------------------------------------------|----------------------------------------------------------------|---------------------------------------------|-----------------------------------------------------------|------------------------------------------|------------------------------------------|------------------------------------------------------------------|----------|-------------------------------|--------------|-------------------------|
|                      |               |                |                                      | in 7 states                                 |                              | supported employment                                                                                                                                                                                     | used the Clubhouse Model and the rest used unenhanced versions | DSM-IV diagnoses and control: 310<br>N= 625 | 333 other DSM-IV diagnoses and intervention: 315<br>N=648 |                                          |                                          | more likely to work competitively compared to control            |          |                               |              |                         |
| (Cook et al., 2005a) | United States | Mental Illness | Unknown : mean age of about 38 years | Community mental health centres in 7 states | 1996                         | <b>Supported Employment (adapted program):</b> Supported employment combining clinical and vocational rehabilitation services (including IPS) 26 and the Program of Assertive Community Treatment (ACT)) | Yes: services as usual                                         | 625                                         | 648                                                       | N/A                                      | N/A                                      | 55% intervention vs. 34% control gained competitive employment   | Yes      | Experimental                  | RCT          | N/A                     |
| (Cook et al., 2005b) | United States | Mental Illness | 18 or older                          | Community mental health centres in 7 states | 1996                         | <b>Integrated medical and vocational:</b> Integrated Psychiatric and Vocational Service (SE)                                                                                                             | Yes: services as usual                                         | 462                                         | 811                                                       | N/A                                      | N/A                                      | In intervention, 2 times as likely to work competitively compare | Yes      | Experimental                  | RCT          | N/A                     |

## Employment interventions in health settings: systematic review and synthesis – Appendix 1

| Full citation          | Country        | Patient group                    | Age group   | Setting                                     | Year of intervention (start) | Intervention                                                                                        | Control/ Comparison or not (Y/N)    | Number of participants (Control) | Number of participants in intervention 1 | Number of participants in intervention 2 | Number of participants in intervention 3 | Quantified Outcome (main)                                                               | Success?  | Observational or Experimental | Study Design                     | Total rigor score (1-9) |
|------------------------|----------------|----------------------------------|-------------|---------------------------------------------|------------------------------|-----------------------------------------------------------------------------------------------------|-------------------------------------|----------------------------------|------------------------------------------|------------------------------------------|------------------------------------------|-----------------------------------------------------------------------------------------|-----------|-------------------------------|----------------------------------|-------------------------|
|                        |                |                                  |             |                                             |                              |                                                                                                     |                                     |                                  |                                          |                                          |                                          | d to control                                                                            |           |                               |                                  |                         |
| (Craig et al., 2014)   | United Kingdom | Mental Illness (psychosis)       | 18-35       | Four early intervention teams               | Unknown                      | <b>Supported Employment:</b> IPS with additional training in motivational techniques aimed at staff | Yes: IPS only                       | 78                               | 81                                       | N/A                                      | N/A                                      | <u>After 12 months</u> , 42.65% in intervention vs. 18.18% in control gained employment | Yes       | Experimental                  | RCT                              | N/A                     |
| (Dresser et al., 2015) | United States  | Mental Illness                   | 14-25       | Community Mental Health Centre              | Unknown                      | <b>Developed program:</b> Transition to Independence model                                          | No                                  | N/A                              | 29                                       | N/A                                      | N/A                                      | 21% of participants gained employment                                                   | Yes       | Observational                 | Prospective Cohort               | 3                       |
| (Ellison et al., 2015) | United States  | Young People with Mental Illness | 17-20       | Residential mental health treatment program | Unknown                      | <b>Supported Employment</b> : Adapted IPS                                                           | No                                  | N/A                              | 33                                       | N/A                                      | N/A                                      | 24% found at least one job                                                              | Promising | Observational                 | Prospective cohort               | 3                       |
| (Fraser et al., 2008)  | United States  | Mental Illness                   | 18 or older | Psychiatric rehabilitation agency           | 1999                         | <b>Supported Employment</b> : IPS                                                                   | Yes: Diversified Placement Approach | 43                               | 41                                       | N/A                                      | N/A                                      | 97.6% of IPS vs. 18.6% of DPA found a competitor                                        | Yes       | Experimental                  | RCT (Secondary Analysis of Data) |                         |



Employment interventions in health settings: systematic review and synthesis – Appendix 1

| Full citation         | Country | Patient group  | Age group                                    | Setting  | Year of intervention (start) | Intervention                                                                                                                               | Control/ Comparison or not (Y/N) | Number of participants (Control) | Number of participants in intervention 1 | Number of participants in intervention 2 | Number of participants in intervention 3 | Quantified Outcome (main)                                                                                                                                                 | Success? | Observational or Experimental | Study Design         | Total rigor score (1-9) |
|-----------------------|---------|----------------|----------------------------------------------|----------|------------------------------|--------------------------------------------------------------------------------------------------------------------------------------------|----------------------------------|----------------------------------|------------------------------------------|------------------------------------------|------------------------------------------|---------------------------------------------------------------------------------------------------------------------------------------------------------------------------|----------|-------------------------------|----------------------|-------------------------|
|                       |         |                |                                              |          |                              |                                                                                                                                            | ch (DPA)                         |                                  |                                          |                                          |                                          | ive job, 2.4% of IPS vs. 9.3% of DPA got an individual placement/ 0% of IPS vs. 23.3% of DPA got a group placement/ 0% of IPS vs. 48.8% of DPA joined agency-run business |          |                               |                      |                         |
| (Fuller et al., 2000) | Japan   | Mental Illness | Unknown - mean age of about 51 +/- 7.2 years | Hospital | 1977                         | <b>Supported Employment (adapted program):</b> Hybrid vocational rehabilitation program. Combines elements of transitional employment with | No                               | N/A                              | 52                                       | N/A                                      | N/A                                      | After intervention, 38.5% were in a competitive employment position and living in the commun                                                                              | Yes      | Observational                 | Retrospective cohort | 2                       |

## Employment interventions in health settings: systematic review and synthesis – Appendix 1

| Full citation           | Country        | Patient group  | Age group   | Setting                       | Year of intervention (start) | Intervention                                                                                                              | Control/ Comparison or not (Y/N)                    | Number of participants (Control) | Number of participants in intervention 1 | Number of participants in intervention 2 | Number of participants in intervention 3 | Quantified Outcome (main)                                                             | Success? | Observational or Experimental | Study Design | Total rigor score (1-9) |
|-------------------------|----------------|----------------|-------------|-------------------------------|------------------------------|---------------------------------------------------------------------------------------------------------------------------|-----------------------------------------------------|----------------------------------|------------------------------------------|------------------------------------------|------------------------------------------|---------------------------------------------------------------------------------------|----------|-------------------------------|--------------|-------------------------|
|                         |                |                |             |                               |                              | supported employment                                                                                                      |                                                     |                                  |                                          |                                          |                                          | ity. Before intervention, only 3.8 % had worked at all while living in the community. |          |                               |              |                         |
| (Gold et al., 2006)     | United States  | Mental Illness | 18 or older | Rehabilitation agencies       | 1996                         | <b>Supported Employment (adapted program):</b> blending Assertive Community Treatment (ACT) with IPS. The ACT-IPS program | Yes: Traditional vocational rehabilitation program  | 77                               | 66                                       | N/A                                      | N/A                                      | 64% in intervention vs. 26% in control held competitive jobs                          | Yes      | Experimental                  | RCT          | N/A                     |
| (Heslin et al., 2011)   | United Kingdom | Mental Illness | 18-65       | Community mental health teams | 2004                         | <b>Supported Employment : IPS</b>                                                                                         | Yes: Traditional vocational rehabilitation services | 95                               | 93                                       | N/A                                      | N/A                                      | 22% in intervention vs. 11% in control gained competitive employment                  | Yes      | Experimental                  | RCT          | N/A                     |
| (Hoffmann et al., 2012) | Switzerland    | Mental Illness | 18 -64      | Hospital                      | 2011                         | <b>Supported Employment (adapted program):</b>                                                                            | Yes: Traditional vocational                         | 54                               | 46                                       | N/A                                      | N/A                                      | <u>After 1 year.</u> 48.2% in intervention                                            | Yes      | Experimental                  | RCT          | N/A                     |

Employment interventions in health settings: systematic review and synthesis – Appendix 1

| Full citation | Country | Patient group | Age group | Setting | Year of intervention (start) | Intervention      | Control/ Comparison or not (Y/N) | Number of participants (Control) | Number of participants in intervention 1 | Number of participants in intervention 2 | Number of participants in intervention 3 | Quantified Outcome (main)                                                                                                                                                                                                                                                                | Success? | Observational or Experimental | Study Design | Total rigor score (1-9) |
|---------------|---------|---------------|-----------|---------|------------------------------|-------------------|----------------------------------|----------------------------------|------------------------------------------|------------------------------------------|------------------------------------------|------------------------------------------------------------------------------------------------------------------------------------------------------------------------------------------------------------------------------------------------------------------------------------------|----------|-------------------------------|--------------|-------------------------|
|               |         |               |           |         |                              | Modeled after IPS | nal rehabilitation               |                                  |                                          |                                          |                                          | ion vs. 18.5 % in control gained competitive employment / 58.7% of the intervention vs. 25.9% of the control were ever competitively employed. <u>In the second year,</u> intervention participants were competitively employed for 24.5 weeks as compared with 10.2 in control group. / |          |                               |              |                         |

## Employment interventions in health settings: systematic review and synthesis – Appendix 1

| Full citation           | Country        | Patient group  | Age group | Setting  | Year of intervention (start)      | Intervention                                                     | Control/ Comparison or not (Y/N)                                | Number of participants (Control) | Number of participants in intervention 1 | Number of participants in intervention 2 | Number of participants in intervention 3 | Quantified Outcome (main)                                                                               | Success? | Observational or Experimental | Study Design | Total rigor score (1-9) |
|-------------------------|----------------|----------------|-----------|----------|-----------------------------------|------------------------------------------------------------------|-----------------------------------------------------------------|----------------------------------|------------------------------------------|------------------------------------------|------------------------------------------|---------------------------------------------------------------------------------------------------------|----------|-------------------------------|--------------|-------------------------|
|                         |                |                |           |          |                                   |                                                                  |                                                                 |                                  |                                          |                                          |                                          | At the end of the study, 45.7% of intervention vs. 16.7% of control were still competitively employed   |          |                               |              |                         |
| (Hoffmann et al., 2014) | Switzerland    | Mental Illness | 18 -64    | Hospital | Unknown (should be same as above) | <b>Supported Employment (adapted program):</b> Modeled after IPS | Yes: Traditional vocational rehabilitation                      | 54                               | 46                                       | N/A                                      | N/A                                      | 65% in intervention vs. 33% in control gained competitive work                                          | Yes      | Experimental                  | RCT          | N/A                     |
| (Howard et al., 2010)   | United Kingdom | Mental Illness | 18-65     | Hospital | 2004                              | <b>Supported Employment : IPS</b>                                | Yes: Local traditional vocational services (treatment as usual) | 99                               | 98                                       | N/A                                      | N/A                                      | <u>No significant difference:</u> 13% in intervention vs. 7% in control obtained competitive employment | No       | Experimental                  | RCT          | N/A                     |

## Employment interventions in health settings: systematic review and synthesis – Appendix 1

| Full citation             | Country       | Patient group  | Age group                       | Setting                          | Year of intervention (start) | Intervention                                                    | Control/ Comparison or not (Y/N) | Number of participants (Control) | Number of participants in intervention 1 | Number of participants in intervention 2 | Number of participants in intervention 3 | Quantified Outcome (main)                                                                                                                                                                              | Success? | Observational or Experimental | Study Design       | Total rigor score (1-9) |
|---------------------------|---------------|----------------|---------------------------------|----------------------------------|------------------------------|-----------------------------------------------------------------|----------------------------------|----------------------------------|------------------------------------------|------------------------------------------|------------------------------------------|--------------------------------------------------------------------------------------------------------------------------------------------------------------------------------------------------------|----------|-------------------------------|--------------------|-------------------------|
| (Kielhofner et al., 2004) | United States | AIDS           | 24-61 (average age of 41 years) | Community health centre          | Unknown                      | <b>Other:</b> Four phase program that is tailored               | No                               | N/A                              | 90                                       | N/A                                      | N/A                                      | The overall success rate was 46.5%                                                                                                                                                                     | Yes      | Observational                 | Prospective cohort | 3                       |
| (Landolt et al., 2016)    | Switzerland   | Mental Illness | 19-60                           | Unknown health care setting      | 2010                         | <b>Supported Employment</b>                                     | No                               | N/A                              | 116                                      | N/A                                      | N/A                                      | The rates of obtaining competitive employment were as follows: 58% (N=67) worked for at least one day, with 31% (N=21) working less than three months, and 69% (N=46) working for three months or more | Yes      | Observational                 | Prospective Cohort | 2                       |
| (Leff et al., 2005)       | United States | Mental Illness | 18 or older                     | Community mental health agencies | Unknown                      | <b>Developed program:</b> Employment Intervention Demonstration | No                               | N/A                              | 1340                                     | N/A                                      | N/A                                      | 43 % obtained one or more competitive                                                                                                                                                                  | Yes      | Observational                 | Prospective Cohort | 3                       |

## Employment interventions in health settings: systematic review and synthesis – Appendix 1

| Full citation         | Country       | Patient group                              | Age group                                                                                                      | Setting                        | Year of intervention (start) | Intervention                                                                                                                             | Control/ Comparison or not (Y/N)         | Number of participants (Control) | Number of participants in intervention 1 | Number of participants in intervention 2 | Number of participants in intervention 3 | Quantified Outcome (main)                                                                                          | Success? | Observational or Experimental | Study Design       | Total rigor score (1-9) |
|-----------------------|---------------|--------------------------------------------|----------------------------------------------------------------------------------------------------------------|--------------------------------|------------------------------|------------------------------------------------------------------------------------------------------------------------------------------|------------------------------------------|----------------------------------|------------------------------------------|------------------------------------------|------------------------------------------|--------------------------------------------------------------------------------------------------------------------|----------|-------------------------------|--------------------|-------------------------|
|                       |               |                                            |                                                                                                                | (seven sites)                  |                              | n Program. (EIDP)                                                                                                                        |                                          |                                  |                                          |                                          |                                          | ive jobs. 63 % obtained only one competitive job                                                                   |          |                               |                    |                         |
| (Lehman et al., 2002) | United States | Mental Illness                             | Unknown - mean age of about 41.5 years (for IPS group it was a mean age of 41.2 and for comparison group 41.2) | Community mental health agency | 1996                         | <b>Supported Employment</b> : IPS                                                                                                        | Yes: Psychosocial rehabilitation program | 106                              | 113                                      | N/A                                      | N/A                                      | 42% in intervention vs. 11% in control to work. 27% in intervention vs. 7% in control to be employed competitively | Yes      | Experimental                  | RCT                | N/A                     |
| (LePage et al., 2016) | United States | Mental Illness and Previously Incarcerated | Unknown (Mean age of 52.3)                                                                                     | Hospital                       | 2011                         | <b>Supported Employment (adapted program)</b> : About Face (one-week standardized vocational rehabilitation group-based program) and IPS | Yes: About Face program only             | 39                               | 49                                       | N/A                                      | N/A                                      | 46% in intervention vs. 21% in control gained employment                                                           | Yes      | Experimental                  | RCT                | N/A                     |
| (LePage et al., 2011) | United States | Ex-offender veterans with                  | Unknown : mean age of                                                                                          | Veteran Affairs medical centre | Unknown                      | <b>Developed program</b> : Domiciliary Residential                                                                                       | Yes: Sasic condition                     | 15                               | 33                                       | 21                                       | N/A                                      | 23.8% of intervention 1 vs. 3% in                                                                                  | No       | Observational                 | Prospective Cohort | 5                       |

Employment interventions in health settings: systematic review and synthesis – Appendix 1

| Full citation         | Country       | Patient group                            | Age group                              | Setting                        | Year of intervention (start) | Intervention                                                                                                                                                                             | Control/ Comparison or not (Y/N) | Number of participants (Control) | Number of participants in intervention 1 | Number of participants in intervention 2 | Number of participants in intervention 3 | Quantified Outcome (main)                                                                                                                                          | Success? | Observational or Experimental | Study Design       | Total rigor score (1-9) |
|-----------------------|---------------|------------------------------------------|----------------------------------------|--------------------------------|------------------------------|------------------------------------------------------------------------------------------------------------------------------------------------------------------------------------------|----------------------------------|----------------------------------|------------------------------------------|------------------------------------------|------------------------------------------|--------------------------------------------------------------------------------------------------------------------------------------------------------------------|----------|-------------------------------|--------------------|-------------------------|
|                       |               | mental illness                           | about 50.5 years                       |                                |                              | Rehabilitation and Treatment Program (DRRTP) 1) self-study 2) full program                                                                                                               |                                  |                                  |                                          |                                          |                                          | intervention 2 and 0% in control were hired competitively<br><u>No difference</u> was found between the basic and self-study conditions                            |          |                               |                    |                         |
| (Lepage et al., 2013) | United States | Ex-offender veterans with mental illness | Unknown : mean age of about 50.5 years | Veteran Affairs medical centre | Unknown                      | (1) <b>Other:</b> self-study using a vocational manual designed for formerly incarcerated veterans<br><br>(2) <b>Other:</b> a group led by vocational staff using the vocational manual. | Yes: Basic vocational services   | 42                               | 42                                       | 27                                       | N/A                                      | 11.9% of intervention 1 vs. 40.7% in intervention 2 and 16.7% in control were hired competitively.<br><u>No differences</u> were found between the basic and self- | Yes      | Observational                 | Prospective Cohort | 5                       |

## Employment interventions in health settings: systematic review and synthesis – Appendix 1

| Full citation          | Country        | Patient group          | Age group                                                                   | Setting                                                            | Year of intervention (start) | Intervention                                                                                                                                              | Control/ Comparison or not (Y/N) | Number of participants (Control) | Number of participants in intervention 1 | Number of participants in intervention 2 | Number of participants in intervention 3 | Quantified Outcome (main)                                                              | Success? | Observational or Experimental | Study Design         | Total rigor score (1-9) |
|------------------------|----------------|------------------------|-----------------------------------------------------------------------------|--------------------------------------------------------------------|------------------------------|-----------------------------------------------------------------------------------------------------------------------------------------------------------|----------------------------------|----------------------------------|------------------------------------------|------------------------------------------|------------------------------------------|----------------------------------------------------------------------------------------|----------|-------------------------------|----------------------|-------------------------|
|                        |                |                        |                                                                             |                                                                    |                              |                                                                                                                                                           |                                  |                                  |                                          |                                          |                                          | study conditions,                                                                      |          |                               |                      |                         |
| (Lucca et al., 2004)   | United States  | Low-income individuals | 21-65 (mean age of 42.1)                                                    | Non-profit community action agency                                 | 1995                         | <b>Developed program:</b> Services for Employment and Education (SEE) Behavioural health program                                                          | No                               | N/A                              | 90                                       | N/A                                      | N/A                                      | 82% obtained at least one paid job                                                     | Yes      | Observational                 | Retrospective cohort | 2                       |
| (Macias et al., 2006)  | United States  | Mental Illness         | 18 or older                                                                 | 1) Mobile assertive community treatment (ACT) team<br>2) Clubhouse | 1995                         | 1) <b>Supported Employment (adapted program):</b> Vocationally integrated program of Assertive Community Treatment (ACT)<br><br>2) <b>Clubhouse Model</b> | Yes: Comparison group            | N/A                              | 63                                       | 58                                       | N/A                                      | <u>No significant difference</u> for employment rates: 64% in ACT vs. 47% in clubhouse | No       | Experimental                  | RCT                  | N/A                     |
| (Marwaha et al., 2014) | United Kingdom | Mental Illness         | Unknown : mean age of about 28.6 years in Model A and 39.5 years in Model B | Community mental health teams                                      | Unknown                      | 1) <b>Other:</b> Model A: worker trained to deliver intervention and 2) <b>Other:</b> Model B                                                             | Yes: Comparison group            | N/A                              | 39                                       | 67                                       | N/A                                      | <u>No significant difference:</u> 10.3% in intervention 1 vs. 22.8 % in intervention 2 | No       | Observational                 | Prospective Cohort   | 3                       |



Employment interventions in health settings: systematic review and synthesis – Appendix 1

| Full citation           | Country       | Patient group  | Age group | Setting              | Year of intervention (start) | Intervention                      | Control/ Comparison or not (Y/N) | Number of participants (Control) | Number of participants in intervention 1 | Number of participants in intervention 2 | Number of participants in intervention 3 | Quantified Outcome (main)                                                                                                                                           | Success? | Observational or Experimental | Study Design       | Total rigor score (1-9) |
|-------------------------|---------------|----------------|-----------|----------------------|------------------------------|-----------------------------------|----------------------------------|----------------------------------|------------------------------------------|------------------------------------------|------------------------------------------|---------------------------------------------------------------------------------------------------------------------------------------------------------------------|----------|-------------------------------|--------------------|-------------------------|
|                         |               |                |           |                      |                              |                                   |                                  |                                  |                                          |                                          |                                          | gained competitive employment. <u>No significant difference</u> : 25.6% in intervention 1 vs. 35.1 % in intervention 2 for rates of employment or training obtained |          |                               |                    |                         |
| (McCarthy et al., 1998) | United States | Mental Illness | Unknown   | Mental Health Centre | 1996                         | <b>Supported Employment : IPS</b> | No                               | N/A                              | 226                                      | N/A                                      | N/A                                      | One site: 54% were successful in obtaining competitive employment. At the other site: 74% were successful in                                                        | Yes      | Observational                 | Prospective Cohort | 1                       |

## Employment interventions in health settings: systematic review and synthesis – Appendix 1

| Full citation         | Country       | Patient group  | Age group   | Setting                        | Year of intervention (start) | Intervention                                                                                                                                         | Control/ Comparison or not (Y/N)                                                                   | Number of participants (Control) | Number of participants in intervention 1 | Number of participants in intervention 2 | Number of participants in intervention 3 | Quantified Outcome (main)                                                                                                                                                                                                               | Success?  | Observational or Experimental | Study Design | Total rigor score (1-9) |
|-----------------------|---------------|----------------|-------------|--------------------------------|------------------------------|------------------------------------------------------------------------------------------------------------------------------------------------------|----------------------------------------------------------------------------------------------------|----------------------------------|------------------------------------------|------------------------------------------|------------------------------------------|-----------------------------------------------------------------------------------------------------------------------------------------------------------------------------------------------------------------------------------------|-----------|-------------------------------|--------------|-------------------------|
| (McGurk et al., 2016) | United States | Mental Illness | 18 or older | Community mental health centre | Unknown                      | <b>Traditional Vocational Rehabilitation</b> (Enhanced with training on cognitive functioning) with Thinking Skills for Work (cognitive remediation) | Yes: Traditional Vocational Rehabilitation (Enhanced with training on cognitive functioning) alone | 28                               | 26                                       | N/A                                      | N/A                                      | Over 3 years: Participants in TSW and E-VR did not differ significantly in competitive work (57% vs. 48%) or paid employment (61% vs. 48%) although those in TSW were more likely to be engaged in any work activity, including paid or | Promising | Experimental                  | RCT          | N/A                     |

## Employment interventions in health settings: systematic review and synthesis – Appendix 1

| Full citation         | Country       | Patient group  | Age group                                             | Setting                                                                   | Year of intervention (start) | Intervention                                                                                   | Control/ Comparison or not (Y/N)     | Number of participants (Control) | Number of participants in intervention 1 | Number of participants in intervention 2 | Number of participants in intervention 3 | Quantified Outcome (main)                                                                                           | Success?  | Observational or Experimental | Study Design | Total rigor score (1-9) |
|-----------------------|---------------|----------------|-------------------------------------------------------|---------------------------------------------------------------------------|------------------------------|------------------------------------------------------------------------------------------------|--------------------------------------|----------------------------------|------------------------------------------|------------------------------------------|------------------------------------------|---------------------------------------------------------------------------------------------------------------------|-----------|-------------------------------|--------------|-------------------------|
|                       |               |                |                                                       |                                                                           |                              |                                                                                                |                                      |                                  |                                          |                                          |                                          | volunteer work (75% vs. 50%)                                                                                        |           |                               |              |                         |
| (McGurk et al., 2015) | United States | Mental Illness | Unknown (Mean age of 44)                              | Community mental health centre                                            | Unknown                      | <b>Supported Employment</b> : (Enhanced) with Thinking Skills for Work (cognitive remediation) | Yes: Supported Employment (Enhanced) | 50                               | 57                                       | N/A                                      | N/A                                      | 60% in intervention vs. 36% in control gained competitive employment                                                | Yes       | Experimental                  | RCT          | N/A                     |
| (McGurk et al., 2009) | United States | Mental Illness | 18 or older                                           | Vocational rehabilitation program affiliated with an urban medical center | 2002                         | <b>Integrated medical and vocational:</b> vocational rehabilitation + cognitive remediation    | Yes: Vocational rehabilitation       | 16                               | 18                                       | N/A                                      | N/A                                      | <u>No significant difference</u> : 39% for intervention vs. 31% for the control for competitive rates of employment | Promising | Experimental                  | RCT          | N/A                     |
| (McGurk et al., 2005) | United States | Mental Illness | Unknown : mean age of about 31.4 years and 43.7 years | Community mental health centre                                            | Unknown                      | <b>Integrated medical and vocational:</b> cognitive training and supported employment(CT+SE)   | Yes: Supported employment only       | 21                               | 23                                       | N/A                                      | N/A                                      | 69.6% in intervention vs. 4.8% in control worked                                                                    | Yes       | Experimental                  | RCT          | N/A                     |

## Employment interventions in health settings: systematic review and synthesis – Appendix 1

| Full citation         | Country       | Patient group  | Age group                                                             | Setting                                                        | Year of intervention (start) | Intervention                      | Control/ Comparison or not (Y/N)                 | Number of participants (Control) | Number of participants in intervention 1 | Number of participants in intervention 2 | Number of participants in intervention 3 | Quantified Outcome (main)                                                                           | Success? | Observational or Experimental | Study Design                     | Total rigor score (1-9) |
|-----------------------|---------------|----------------|-----------------------------------------------------------------------|----------------------------------------------------------------|------------------------------|-----------------------------------|--------------------------------------------------|----------------------------------|------------------------------------------|------------------------------------------|------------------------------------------|-----------------------------------------------------------------------------------------------------|----------|-------------------------------|----------------------------------|-------------------------|
| (Michon et al., 2014) | Netherlands   | Mental Illness | 18-65                                                                 | Community mental health care divisions                         | 2005                         | <b>Supported Employment</b> : IPS | Yes: Traditional vocational rehabilitation (TVR) | 78                               | 69                                       | N/A                                      | N/A                                      | 44% in intervention vs. 25% in control found competitive work                                       | Yes      | Experimental                  | RCT                              | N/A                     |
| (Morris et al., 2014) | Australia     | Mental Illness | 18-64                                                                 | Community mental health centre                                 | 2010                         | <b>Supported Employment</b> : IPS | No                                               | N/A                              | 95                                       | N/A                                      | N/A                                      | Over 12 months: mean competitive employment of 57%.<br>Over 9 months: 47.4% commenced employment    | Yes      | Observational                 | Prospective Cohort               | 2                       |
| (Mueser et al., 2012) | United States | Mental Illness | Unknown : mean age in control was 39.22 years and IPS was 38.51 years | Mental health centers (or a psychiatric rehabilitation agency) | Not Applicable               | <b>Supported Employment</b> : IPS | Yes: Conventional vocational rehabilitation      | 59                               | 47                                       | N/A                                      | N/A                                      | Cumulative employment rates of 60% in intervention vs. 24% in control had competitive work outcomes | Yes      | Experimental                  | RCT (Secondary Analysis of Data) | N/A                     |

## Employment interventions in health settings: systematic review and synthesis – Appendix 1

| Full citation          | Country       | Patient group                                                                          | Age group                                                | Setting                        | Year of intervention (start) | Intervention                                                                                                          | Control/ Comparison or not (Y/N)           | Number of participants (Control) | Number of participants in intervention 1    | Number of participants in intervention 2         | Number of participants in intervention 3 | Quantified Outcome (main)                                                                                                                                                                             | Success? | Observational or Experimental | Study Design | Total rigor score (1-9) |
|------------------------|---------------|----------------------------------------------------------------------------------------|----------------------------------------------------------|--------------------------------|------------------------------|-----------------------------------------------------------------------------------------------------------------------|--------------------------------------------|----------------------------------|---------------------------------------------|--------------------------------------------------|------------------------------------------|-------------------------------------------------------------------------------------------------------------------------------------------------------------------------------------------------------|----------|-------------------------------|--------------|-------------------------|
| (Mueser et al., 2004a) | United States | Mental Illness - Inner-city clients with mainly African American or Latino backgrounds | Unknown : mean ages were about 40.9, 41.7 and 41.1 years | Community mental health centre | 1996                         | 1) <b>Supported Employment</b> : IPS<br><br>2) <b>Developed program</b> : a psychosocial rehabilitation (PSR) program | Yes: Standard brokered vocational services | 69                               | 68 (individual placement and support (IPS)) | 67 (a psychosocial rehabilitation (PSR) program) | N/A                                      | 75% in intervention 1 vs. 45.2% in intervention 2 obtained work                                                                                                                                       | Yes      | Experimental                  | RCT          | N/A                     |
| (Mueser et al., 2004b) | United States | Mental Illness                                                                         | Unknown                                                  | Regional mental health centre  | Unknown                      | 1) <b>Supported Employment</b> : IPS<br><br>2) <b>Other</b> : Psychosocial rehabilitation program                     | Yes: Standard services                     | 61(?)                            | Unknown of total 176                        | Unknown of total 176                             | N/A                                      | <u>2-year period</u> : 74% of intervention 1 vs. 18% of intervention 2 vs. 27% of control obtained competitive work. 74% of intervention 1 vs. 35% of intervention 2 vs. 54% of control got paid jobs | Yes      | Experimental                  | RCT          | N/A                     |
| (Oshima et al., 2014)  | Japan         | Mental Illness                                                                         | 18-59                                                    | Community support centre       | 2006                         | <b>Supported Employment</b> : IPS                                                                                     | Yes: Conventional vocational               | 19                               | 18                                          | N/A                                              | N/A                                      | 44.4% in intervention vs. 10.5% in                                                                                                                                                                    | Yes      | Experimental                  | RCT          | N/A                     |

## Employment interventions in health settings: systematic review and synthesis – Appendix 1

| Full citation              | Country       | Patient group                    | Age group | Setting                                    | Year of intervention (start) | Intervention                                                                       | Control/ Comparison or not (Y/N)         | Number of participants (Control) | Number of participants in intervention 1 | Number of participants in intervention 2     | Number of participants in intervention 3 | Quantified Outcome (main)                                                                                                                                     | Success?     | Observational or Experimental | Study Design       | Total rigor score (1-9) |
|----------------------------|---------------|----------------------------------|-----------|--------------------------------------------|------------------------------|------------------------------------------------------------------------------------|------------------------------------------|----------------------------------|------------------------------------------|----------------------------------------------|------------------------------------------|---------------------------------------------------------------------------------------------------------------------------------------------------------------|--------------|-------------------------------|--------------------|-------------------------|
|                            |               |                                  |           | (day treatment activities)                 |                              |                                                                                    | nal services                             |                                  |                                          |                                              |                                          | control worked competitively.                                                                                                                                 |              |                               |                    |                         |
| (Ottomanelli et al., 2017) | United States | Spinal Cord Injury               | 18-65     | Spinal Cord Injury (SCI) Centers (7 sites) | 2010                         | <b>Supported Employment : IPS</b>                                                  | No                                       | N/A                              | 213                                      | N/A                                          | N/A                                      | <u>At 24 months:</u> 43.2% obtained competitive jobs<br>For the participants without traumatic brain injury (TBI), 36 of 69 (52.2%) obtained competitive jobs | Yes          | Observational                 | Prospective Cohort | 3                       |
| (Ottomanelli et al., 2015) | United States | Spinal Cord Injury               | 18-65     | Veterans Affairs spinal cord injury centre | Unknown                      | <b>Supported Employment : IPS</b>                                                  | No                                       | N/A                              | 81                                       | N/A                                          | N/A                                      | 25.9% of participants gained competitive employment                                                                                                           | Not reported | Observational                 | Prospective Cohort | 2                       |
| (Ottomanelli et al., 2014) | United States | Veterans with spinal cord injury | 18-65     | Spinal cord injury (SCI) centres           | Unknown                      | 1) <b>Supported Employment (adapted program):</b> SCI Vocation Integration Program | Yes: Treatment as usual (TAU) at observa | 18                               | 43                                       | 42 (Treatment as usual in experimental site) | N/A                                      | 30.8% in intervention 1 vs. 10.5% in intervention 2 vs. 2.3% in                                                                                               | Yes          | Experimental                  | RCT                | N/A                     |

## Employment interventions in health settings: systematic review and synthesis – Appendix 1

| Full citation              | Country       | Patient group                    | Age group | Setting                          | Year of intervention (start) | Intervention                                                                                                                                                                                      | Control/ Comparison or not (Y/N)                    | Number of participants (Control) | Number of participants in intervention 1 | Number of participants in intervention 2     | Number of participants in intervention 3 | Quantified Outcome (main)                                                                                                                                                          | Success? | Observational or Experimental | Study Design | Total rigor score (1-9) |
|----------------------------|---------------|----------------------------------|-----------|----------------------------------|------------------------------|---------------------------------------------------------------------------------------------------------------------------------------------------------------------------------------------------|-----------------------------------------------------|----------------------------------|------------------------------------------|----------------------------------------------|------------------------------------------|------------------------------------------------------------------------------------------------------------------------------------------------------------------------------------|----------|-------------------------------|--------------|-------------------------|
|                            |               |                                  |           |                                  |                              | which follows IPS principles.<br><br>2) <b>Usual Care:</b><br>Treatment as Usual (TAU) in experimental site                                                                                       | tional site                                         |                                  |                                          |                                              |                                          | control gained employment                                                                                                                                                          |          |                               |              |                         |
| (Ottomanelli et al., 2012) | United States | Veterans with spinal cord injury | 18-65     | Spinal cord injury (SCI) centres | Unknown                      | 1) <b>Supported Employment (adapted program):</b><br>SCI Vocation Integration Program which follows IPS principles.<br><br>2) <b>Usual Care:</b><br>Treatment as Usual (TAU) in experimental site | Yes: Treatment as usual (TAU) at observational site | 44                               | 81                                       | 76 (Treatment as Usual in experimental site) | N/A                                      | In intervention 1, 2.5 times more likely to gain competitive employment compared to intervention 2 and 11.4 times more likely to obtain competitive employment compared to control | Yes      | Experimental                  | RCT          | N/A                     |

## Employment interventions in health settings: systematic review and synthesis – Appendix 1

| Full citation           | Country       | Patient group  | Age group | Setting                         | Year of intervention (start) | Intervention                                                                                                                                                                       | Control/ Comparison or not (Y/N) | Number of participants (Control) | Number of participants in intervention 1 | Number of participants in intervention 2 | Number of participants in intervention 3 | Quantified Outcome (main)                                                                                                                                                                                                                                                           | Success? | Observational or Experimental | Study Design                               | Total rigor score (1-9) |
|-------------------------|---------------|----------------|-----------|---------------------------------|------------------------------|------------------------------------------------------------------------------------------------------------------------------------------------------------------------------------|----------------------------------|----------------------------------|------------------------------------------|------------------------------------------|------------------------------------------|-------------------------------------------------------------------------------------------------------------------------------------------------------------------------------------------------------------------------------------------------------------------------------------|----------|-------------------------------|--------------------------------------------|-------------------------|
| (Pandiani et al., 2004) | United States | Mental Illness | 18-64     | Community mental health centres | 2001                         | <p>1) <b>Integrated medical and vocational:</b> both CMHC and VR services</p> <p>2) <b>Usual care:</b> CMHC only</p> <p>3) <b>Vocational rehabilitation (VR) services only</b></p> | Yes: No employment services      | 62% of 2938 (1822)               | 14% of 2938 (411)                        | 16% of 2938 (470)                        | 8% of 293 (235)                          | 58% in intervention 1, vs. 45% in intervention 2. 45% in intervention 2, vs. 37% in intervention 3. All three groups of clients who received employment services were substantially more likely to be employed than individuals who received no employment services (19% employed). | Yes      | Observational                 | Retrospective (Secondary Analysis of Data) | 4                       |



## Employment interventions in health settings: systematic review and synthesis – Appendix 1

| Full citation           | Country | Patient group  | Age group   | Setting                                                                                       | Year of intervention (start) | Intervention                                      | Control/ Comparison or not (Y/N)            | Number of participants (Control) | Number of participants in intervention 1 | Number of participants in intervention 2 | Number of participants in intervention 3 | Quantified Outcome (main)                                                                                                                                                                                    | Success?  | Observational or Experimental | Study Design | Total rigor score (1-9) |
|-------------------------|---------|----------------|-------------|-----------------------------------------------------------------------------------------------|------------------------------|---------------------------------------------------|---------------------------------------------|----------------------------------|------------------------------------------|------------------------------------------|------------------------------------------|--------------------------------------------------------------------------------------------------------------------------------------------------------------------------------------------------------------|-----------|-------------------------------|--------------|-------------------------|
| (Poremski et al., 2015) | Canada  | Mental Illness | 18 or older | Recruited from multiple settings, including hospitals, and health and social services centres | 2009                         | <b>Supported Employment</b> : IPS + Housing First | Yes: Treatment as Usual (TAU) Housing First | 45                               | 45                                       | N/A                                      | N/A                                      | <u>At 8 months of good fidelity:</u> 34% in intervention vs 22% in control gained competitive employment <u>After approx. 700 days:</u> 52% in intervention vs. 44% in control gained competitive employment | Promising | Experimental                  | RCT          | N/A                     |
| (Poremski et al., 2016) | Canada  | Mental Illness | 18 or older | Recruited from multiple settings, including hospitals, and health and social                  | 2009                         | <b>Supported Employment</b> : IPS + Housing First | Yes: Treatment as Usual (TAU) Housing First | 14                               | 13                                       | N/A                                      | N/A                                      | 50% in intervention vs. 15% in control gained competitive employment                                                                                                                                         | Promising | Experimental                  | RCT          | N/A                     |

## Employment interventions in health settings: systematic review and synthesis – Appendix 1

| Full citation                | Country       | Patient group  | Age group | Setting                                            | Year of intervention (start) | Intervention                                                                                          | Control/ Comparison or not (Y/N) | Number of participants (Control) | Number of participants in intervention 1 | Number of participants in intervention 2 | Number of participants in intervention 3 | Quantified Outcome (main)                                                                                                                                        | Success?  | Observational or Experimental | Study Design       | Total rigor score (1-9) |
|------------------------------|---------------|----------------|-----------|----------------------------------------------------|------------------------------|-------------------------------------------------------------------------------------------------------|----------------------------------|----------------------------------|------------------------------------------|------------------------------------------|------------------------------------------|------------------------------------------------------------------------------------------------------------------------------------------------------------------|-----------|-------------------------------|--------------------|-------------------------|
|                              |               |                |           | services centres                                   |                              |                                                                                                       |                                  |                                  |                                          |                                          |                                          |                                                                                                                                                                  |           |                               |                    |                         |
| (Porteous and Waghorn, 2007) | New Zealand   | Mental Illness | 14-27     | Early intervention community mental health service | 2002                         | <b>Supported Employment</b> : IPS                                                                     | Yes: Comparison group            | N/A                              | 100                                      | 125                                      | N/A                                      | 49% of participants in intervention 1 compared to 59% in intervention 2 attained a vocational outcome of competitive employment or enrolment in formal education | Yes       | Observational                 | Prospective Cohort | 1                       |
| (Puig et al., 2016)          | United States | Mental Illness | 20-66     | Outpatient psychiatric services clinic             | Unknown                      | <b>Supported Employment (adapted program):</b> Supported Employment + Compensatory Cognitive Training | No                               | N/A                              | 40                                       | N/A                                      | N/A                                      | <u>At 24 months:</u> 47.5% obtained a job                                                                                                                        | Promising | Observational                 | Prospective cohort | 3                       |

## Employment interventions in health settings: systematic review and synthesis – Appendix 1

| Full citation        | Country       | Patient group                  | Age group                      | Setting                                                    | Year of intervention (start) | Intervention                                                                                                                                | Control/ Comparison or not (Y/N) | Number of participants (Control) | Number of participants in intervention 1 | Number of participants in intervention 2 | Number of participants in intervention 3 | Quantified Outcome (main)                                    | Success?  | Observational or Experimental | Study Design                                       | Total rigor score (1-9) |
|----------------------|---------------|--------------------------------|--------------------------------|------------------------------------------------------------|------------------------------|---------------------------------------------------------------------------------------------------------------------------------------------|----------------------------------|----------------------------------|------------------------------------------|------------------------------------------|------------------------------------------|--------------------------------------------------------------|-----------|-------------------------------|----------------------------------------------------|-------------------------|
|                      |               |                                |                                |                                                            |                              | intervention (CCT)                                                                                                                          |                                  |                                  |                                          |                                          |                                          |                                                              |           |                               |                                                    |                         |
| (Reddy et al., 2016) | United States | Mental Illness                 | 21 or older                    | Veteran Affairs clinic and mental health center            | Unknown                      | <b>Supported Employment</b>                                                                                                                 | No                               | N/A                              | 65                                       | N/A                                      | N/A                                      | 35% obtained competitive employment                          | Promising | Observational                 | Prospective cohort                                 | 2                       |
| (Roush, 2009)        | United States | Mental Illness                 | 18 or older                    | Community mental health centre                             | 2000                         | <b>Developed program:</b> Abacus program (Menu Approach based vocational program for individuals with severe and persistent mental illness) | No                               | N/A                              | 140                                      | N/A                                      | N/A                                      | 59% of clients had successful instances of employment        | Yes       | Observational                 | Retrospective Cohort, (Secondary Analysis of Data) | 3                       |
| (Rusch et al., 2014) | Switzerland   | Mental Illness                 | Unknown : mean age of 41 years | Psychiatric clinics                                        | 2010                         | <b>Supported Employment</b>                                                                                                                 | No                               | N/A                              | 96                                       | N/A                                      | N/A                                      | 73% worked for at least a day                                | Promising | Observational                 | Retrospective cohort                               | 3                       |
| (Sato et al., 2014)  | Japan         | Mental Illness (Schizophrenia) | 20-45                          | Hospitals (10 sites) and Community Welfare Agency (1 site) | Unknown                      | <b>Supported Employment (adapted program):</b> Cognitive Remediation (CR) and Supported Employment (SE)                                     | Yes: Supported Employment (SE)   | 57                               | 52                                       | N/A                                      | N/A                                      | No significant difference in employment outcomes between two | No        | Observational                 | Prospective Controlled Study                       | 6                       |

## Employment interventions in health settings: systematic review and synthesis – Appendix 1

| Full citation        | Country   | Patient group                  | Age group                      | Setting                     | Year of intervention (start) | Intervention                                                                                                                       | Control/ Comparison or not (Y/N)           | Number of participants (Control) | Number of participants in intervention 1 | Number of participants in intervention 2 | Number of participants in intervention 3 | Quantified Outcome (main)                                                                                                  | Success? | Observational or Experimental | Study Design       | Total rigor score (1-9) |
|----------------------|-----------|--------------------------------|--------------------------------|-----------------------------|------------------------------|------------------------------------------------------------------------------------------------------------------------------------|--------------------------------------------|----------------------------------|------------------------------------------|------------------------------------------|------------------------------------------|----------------------------------------------------------------------------------------------------------------------------|----------|-------------------------------|--------------------|-------------------------|
|                      |           |                                |                                |                             |                              |                                                                                                                                    |                                            |                                  |                                          |                                          |                                          | groups. <u>At one year:</u> 15.2% in intervention vs. 14.9% in control gained competitive employment                       |          |                               |                    |                         |
| (Tan et al., 2016)   | Singapore | Mental Illness                 | Unknown : mean age of 42 years | Unknown health care setting | 2009                         | <b>Supported Employment (adapted program):</b> Occupational therapy psychiatric rehabilitation services + supported employment     | No                                         | N/A                              | 1287                                     | N/A                                      | N/A                                      | Good job placement rate of 63%                                                                                             | Yes      | Observational                 | Prospective cohort | 2                       |
| (Tsang et al., 2016) | Hong Kong | Mental Illness (Schizophrenia) | 18 or older                    | Hospital                    | 2011                         | <b>Supported Employment (adapted program):</b> Integrated supported employment (ISE) plus cognitive remediation training (ISE+CRT) | Yes: Integrated supported employment (ISE) | 45                               | 45                                       | N/A                                      | N/A                                      | <u>At 11 months:</u> 44.4% in intervention vs. 55.6% of control group obtained competitive employment <u>At 15 months:</u> | No       | Experimental                  | RCT                | N/A                     |

## Employment interventions in health settings: systematic review and synthesis – Appendix 1

| Full citation        | Country   | Patient group  | Age group                                                                                      | Setting                                                                     | Year of intervention (start) | Intervention                                                                                                                                      | Control/ Comparison or not (Y/N)           | Number of participants (Control) | Number of participants in intervention 1 | Number of participants in intervention 2 | Number of participants in intervention 3 | Quantified Outcome (main)                                                                                                                                              | Success? | Observational or Experimental | Study Design | Total rigor score (1-9) |
|----------------------|-----------|----------------|------------------------------------------------------------------------------------------------|-----------------------------------------------------------------------------|------------------------------|---------------------------------------------------------------------------------------------------------------------------------------------------|--------------------------------------------|----------------------------------|------------------------------------------|------------------------------------------|------------------------------------------|------------------------------------------------------------------------------------------------------------------------------------------------------------------------|----------|-------------------------------|--------------|-------------------------|
|                      |           |                |                                                                                                |                                                                             |                              |                                                                                                                                                   |                                            |                                  |                                          |                                          |                                          | 60.6% in intervention vs. 62.2% of control group obtained competitive employment                                                                                       |          |                               |              |                         |
| (Tsang et al., 2010) | Hong Kong | Mental Illness | Unknown (mean age for ISE was 34.12, mean age for IPS was 34.07 and mean age for TVR was 36.5) | Community mental health service units (2 sites) and day hospitals (3 sites) | 2003                         | 1) <b>Supported employment model (adapted program)</b><br>Integrated supported employment<br><br>2) <b>Individual Placement and Support (IPS)</b> | Yes: Traditional vocational rehabilitation | 66                               | 58                                       | 65                                       | N/A                                      | <u>At 39 month follow-up</u> : 82.8% in intervention 1 vs. 61.5% in intervention 2 vs. 6.1% (15 month follow up) in control successfully gained competitive employment | Yes      | Experimental                  | RCT          | N/A                     |
| (Tsang et al., 2009) | Hong Kong | Mental Illness | Unknown (mean age for ISE was 33.52,                                                           | Community mental health centre                                              | 2003                         | 1) <b>Supported Employment (adapted program)</b><br>Integrated                                                                                    | Yes: Traditional vocational                | 55                               | 52                                       | 56                                       | N/A                                      | <u>During 15 months</u> : 41 78.8% of                                                                                                                                  | Yes      | Experimental                  | RCT          | N/A                     |

## Employment interventions in health settings: systematic review and synthesis – Appendix 1

| Full citation          | Country       | Patient group          | Age group                                | Setting           | Year of intervention (start) | Intervention                                                                                                                             | Control/ Comparison or not (Y/N)   | Number of participants (Control) | Number of participants in intervention 1 | Number of participants in intervention 2 | Number of participants in intervention 3 | Quantified Outcome (main)                                                                                 | Success?  | Observational or Experimental | Study Design | Total rigor score (1-9) |
|------------------------|---------------|------------------------|------------------------------------------|-------------------|------------------------------|------------------------------------------------------------------------------------------------------------------------------------------|------------------------------------|----------------------------------|------------------------------------------|------------------------------------------|------------------------------------------|-----------------------------------------------------------------------------------------------------------|-----------|-------------------------------|--------------|-------------------------|
|                        |               |                        | was 33.77 for IPS and was 36.35 for TVR) |                   |                              | supported employment<br>2) <b>Supported Employment IPS</b>                                                                               | rehabilitation.                    |                                  |                                          |                                          |                                          | ISE participants obtained competitive employment, compared with 53.6% of IPS and 7.3% of TVR participants |           |                               |              |                         |
| (Twamley et al., 2014) | United States | Traumatic Brain Injury | Unknown : mean age of 32 years           | Healthcare System | Unknown                      | <b>Supported Employment (adapted program):</b> CogSMART (Cognitive Symptom Management and Rehabilitation Therapy) + Supported Employment | Yes: Enhanced Supported Employment | 18                               | 16                                       | N/A                                      | N/A                                      | <u>At 14 weeks:</u> 50% in the intervention gained competitive employment compared to 26% in the control  | Promising | Experimental                  | RCT          | N/A                     |
| (Twamley et al., 2015) | United States | Traumatic Brain Injury | Unknown : mean age of 32 years           | Healthcare System | Unknown                      | <b>Supported Employment (adapted program):</b> CogSMART (Cognitive Symptom Management                                                    | Yes: Enhanced Supported Employment | 25                               | 25                                       | N/A                                      | N/A                                      | <u>At 3, 6 and 12 months:</u> There were no group differences in                                          | No        | Experimental                  | RCT          | N/A                     |

## Employment interventions in health settings: systematic review and synthesis – Appendix 1

| Full citation             | Country        | Patient group  | Age group                      | Setting                                  | Year of intervention (start) | Intervention                                       | Control/ Comparison or not (Y/N) | Number of participants (Control) | Number of participants in intervention 1 | Number of participants in intervention 2 | Number of participants in intervention 3 | Quantified Outcome (main)                                                                                                                                   | Success?  | Observational or Experimental | Study Design                         | Total rigor score (1-9) |
|---------------------------|----------------|----------------|--------------------------------|------------------------------------------|------------------------------|----------------------------------------------------|----------------------------------|----------------------------------|------------------------------------------|------------------------------------------|------------------------------------------|-------------------------------------------------------------------------------------------------------------------------------------------------------------|-----------|-------------------------------|--------------------------------------|-------------------------|
|                           |                |                |                                |                                          |                              | and Rehabilitation Therapy) + Supported Employment |                                  |                                  |                                          |                                          |                                          | competitive work attainment (52% obtained competitive jobs in each group)                                                                                   |           |                               |                                      |                         |
| (Van Veggel et al., 2015) | United Kingdom | Mental Illness | Unknown : mean age of 39 years | Community mental health teams (17 sites) | 2008                         | <b>Supported Employment</b> : IPS                  | Yes: Pre-IPS clients             | 3300                             | 27408                                    | N/A                                      | N/A                                      | 24.9% in intervention vs. 14.3% in control gained competitive employment For employment that is not competitive: 11.4% in intervention vs. 25.7% in control | Yes       | Observational                 | Prospective Cohort / Parallel Design | 5                       |
| (Waghorn et al., 2015)    | Australia      | Mental Illness | 18-59                          | Community mental health teams (4 sites)  | 2008                         | <b>Supported Employment</b> : IPS                  | No                               | N/A                              | 160                                      | N/A                                      | N/A                                      | <u>At 6 months:</u> 27.5% obtained competitive employment <u>At 12</u>                                                                                      | Promising | Observational                 | Prospective Cohort / Parallel Design | 3                       |

## Employment interventions in health settings: systematic review and synthesis – Appendix 1

| Full citation          | Country   | Patient group  | Age group                                                                                              | Setting                                                         | Year of intervention (start) | Intervention                      | Control/ Comparison or not (Y/N)                      | Number of participants (Control) | Number of participants in intervention 1 | Number of participants in intervention 2 | Number of participants in intervention 3 | Quantified Outcome (main)                                                                                                               | Success? | Observational or Experimental | Study Design       | Total rigor score (1-9) |
|------------------------|-----------|----------------|--------------------------------------------------------------------------------------------------------|-----------------------------------------------------------------|------------------------------|-----------------------------------|-------------------------------------------------------|----------------------------------|------------------------------------------|------------------------------------------|------------------------------------------|-----------------------------------------------------------------------------------------------------------------------------------------|----------|-------------------------------|--------------------|-------------------------|
|                        |           |                |                                                                                                        |                                                                 |                              |                                   |                                                       |                                  |                                          |                                          |                                          | <u>months:</u><br>35.6% obtained competitive employment                                                                                 |          |                               |                    |                         |
| (Waghorn et al., 2014) | Australia | Mental Illness | 18-59                                                                                                  | Community mental health centre                                  | 2008                         | <b>Supported Employment</b> : IPS | Yes: Referral to other disability employment services | 102                              | 106                                      | N/A                                      | N/A                                      | <u>At 6 months:</u><br>31.1% in intervention vs. 18.6% in control<br><u>At 12 months:</u><br>42.5% in intervention vs. 23.5% in control | Yes      | Experimental                  | RCT                | N/A                     |
| (Watzke et al., 2009)  | Germany   | Mental Illness | Unknown - mean age of about 33 years (33.1+/-9.2 for rehab group, 33.0+/-8.9 for the comparison group) | Unknown healthcare setting (psychiatric rehabilitation program) | 2002                         | <b>Vocational rehabilitation</b>  | Yes: Sheltered work conditions                        | 75                               | 56                                       | 67                                       | N/A                                      | <u>At 9 months follow-up</u><br>39.7% in intervention vs. 18.7% in control for day structuring employment (mainly sheltered)            | Yes      | Observational                 | Prospective Cohort | 7                       |



## Employment interventions in health settings: systematic review and synthesis – Appendix 1

| Full citation           | Country       | Patient group     | Age group                      | Setting                          | Year of intervention (start) | Intervention                                      | Control/ Comparison or not (Y/N) | Number of participants (Control) | Number of participants in intervention 1 | Number of participants in intervention 2 | Number of participants in intervention 3 | Quantified Outcome (main)                                                                                                                                                                               | Success?  | Observational or Experimental | Study Design       | Total rigor score (1-9) |
|-------------------------|---------------|-------------------|--------------------------------|----------------------------------|------------------------------|---------------------------------------------------|----------------------------------|----------------------------------|------------------------------------------|------------------------------------------|------------------------------------------|---------------------------------------------------------------------------------------------------------------------------------------------------------------------------------------------------------|-----------|-------------------------------|--------------------|-------------------------|
| (Waynor and Gill, 2015) | United States | Mental Illness    | Unknown : mean age of 44 years | Community mental health programs | 2008                         | <b>Supported Employment</b>                       | No                               | N/A                              | 105                                      | N/A                                      | N/A                                      | 38% attained employment goal                                                                                                                                                                            | Promising | Observational                 | Prospective Cohort | 2                       |
| (Williams et al., 2015) | Australia     | Mental Illness    | 18-64                          | Community mental health teams    | 2012                         | <b>Supported Employment : IPS</b>                 | No                               | N/A                              | 114                                      | N/A                                      | N/A                                      | 33.3% at Site A, 37% at Site B and 12% at Site C started competitive employment. 70.3 % at Site A, 55.5% at Site B and 20% at Site C commenced any vocational activity including competitive employment | Yes       | Observational                 | Prospective Cohort | 4                       |
| (Wittich et al., 2013)  | Canada        | Visual Impairment | 19-47                          | Rehabilitation Centre            | 2012                         | <b>Other:</b> Pre-employment program specifically | No                               | N/A                              | 9 (1 participant did not finish)         | N/A                                      | N/A                                      | <u>After 4 weeks:</u> 63% (5 of 8) of participants                                                                                                                                                      | Promising | Observational                 | Prospective Cohort | 3                       |

## Employment interventions in health settings: systematic review and synthesis – Appendix 1

| Full citation       | Country   | Patient group  | Age group             | Setting  | Year of intervention (start) | Intervention                                                              | Control/ Comparison or not (Y/N)           | Number of participants (Control) | Number of participants in intervention 1 | Number of participants in intervention 2 | Number of participants in intervention 3 | Quantified Outcome (main)                                                                             | Success? | Observational or Experimental | Study Design       | Total rigor score (1-9) |
|---------------------|-----------|----------------|-----------------------|----------|------------------------------|---------------------------------------------------------------------------|--------------------------------------------|----------------------------------|------------------------------------------|------------------------------------------|------------------------------------------|-------------------------------------------------------------------------------------------------------|----------|-------------------------------|--------------------|-------------------------|
|                     |           |                |                       |          |                              | designed for English Speaking Visually impaired persons in Quebec.        |                                            |                                  | the intervention)                        |                                          |                                          | nts found employment After 8 months: 4 of the 5 had maintained employment                             |          |                               |                    |                         |
| (Wong et al., 2000) | Hong Kong | Mental Illness | 18-65                 | Hospital | 1995                         | <b>Supported Employment</b> (program not specified)                       | No                                         | N/A                              | 458                                      | N/A                                      | N/A                                      | 67.3% obtained competitive employment                                                                 | Yes      | Observational                 | Prospective Cohort | 5                       |
| (Wong et al., 2008) | Hong Kong | Mental Illness | 18-55                 | Hospital | 2001                         | <b>Supported Employment</b> (program not specified)                       | Yes: Traditional vocational rehabilitation | 46                               | 46                                       | N/A                                      | N/A                                      | <u>Over 18 month study period:</u> 70% in intervention vs. 29% in control were competitively employed | Yes      | Experimental                  | RCT                | N/A                     |
| (Wong et al., 2001) | Hong Kong | Mental Illness | 16-60 (mean age 35.4) | Hospital | 1995                         | <b>Supported Employment (adapted program):</b> Based on principles of IPS | No                                         | N/A                              | 388                                      | N/A                                      | N/A                                      | 68.8% obtained competitive employment                                                                 | Yes      | Observational                 | Prospective Cohort | 5                       |

## Employment interventions in health settings: systematic review and synthesis – Appendix 1

| Full citation              | Country | Patient group                | Age group | Setting                                             | Year of intervention (start) | Intervention                                                                              | Control/ Comparison or not (Y/N) | Number of participants (Control) | Number of participants in intervention 1 | Number of participants in intervention 2 | Number of participants in intervention 3 | Quantified Outcome (main)                               | Success? | Observational or Experimental | Study Design       | Total rigor score (1-9) |
|----------------------------|---------|------------------------------|-----------|-----------------------------------------------------|------------------------------|-------------------------------------------------------------------------------------------|----------------------------------|----------------------------------|------------------------------------------|------------------------------------------|------------------------------------------|---------------------------------------------------------|----------|-------------------------------|--------------------|-------------------------|
| (Zanis and Coviello, 2001) | Unknown | Methadone maintained clients | 36-60     | Unknown healthcare setting (drug treatment program) | Unknown                      | <b>Other:</b> Employment case management (comprehensive employment intervention strategy) | No                               | N/A                              | 10                                       | N/A                                      | N/A                                      | At 2 month follow-up: 90% in intervention were employed | Yes      | Observational                 | Prospective Cohort | 3                       |

**Supplemental Appendix 3: Factors associated with successful employment interventions.**

| <b>1. A multidisciplinary team with open communication to address patient needs</b> |                                                                                                                                                                                                                                                                                                                                                                                                                                                                                                                                                                                                                                                                                                                                                                                                                                                                                                                                                                                                                                                                                                                                                      |
|-------------------------------------------------------------------------------------|------------------------------------------------------------------------------------------------------------------------------------------------------------------------------------------------------------------------------------------------------------------------------------------------------------------------------------------------------------------------------------------------------------------------------------------------------------------------------------------------------------------------------------------------------------------------------------------------------------------------------------------------------------------------------------------------------------------------------------------------------------------------------------------------------------------------------------------------------------------------------------------------------------------------------------------------------------------------------------------------------------------------------------------------------------------------------------------------------------------------------------------------------|
| Services are integrated, multi-disciplinary and coordinated                         | <i>61 studies</i><br>(Alverson et al., 1995; Au et al., 2015; Becker et al., 2007, 1999, Bejerholm et al., 2017, 2015, Bell et al., 2014, 2008; Blankertz and Robinson, 1996; Bond et al., 2015; Bowie et al., 2016; Burns et al., 2015, 2007; Burns and Catty, 2008; Burt, 2012; Chang et al., 2016; Chiu and Wong, 2001; Chuang et al., 2015; Cook et al., 2008, 2005a, 2005b; Craig et al., 2014; Dresser et al., 2015; Ellison et al., 2015; Fuller et al., 2000; Gold et al., 2006; Hoffmann et al., 2014; Howard et al., 2010; Landolt et al., 2016; A. Lehman et al., 2002; LePage et al., 2016; McCarthy et al., 1998; McGurk et al., 2016, 2005; McGurk and Mueser, 2015; Michon et al., 2014; Morris et al., 2014; Mueser et al., 2004a, 2004b; Oshima et al., 2014; Ottomanelli et al., 2017, 2015, 2014, 2012; Pandiani et al., 2004; Poremski et al., 2016, 2015; Porteous and Waghorn, 2007; Roush, 2009; Rusch et al., 2014; Sato et al., 2014; Tan et al., 2016; Tsang et al., 2010, 2009; Van Veggel et al., 2015; Waghorn et al., 2015, 2014; Watzke et al., 2009; Williams et al., 2015; Wittich et al., 2013; Wong et al., 2000) |
| Ongoing communication amongst multi-disciplinary team                               | <i>11 studies</i>                                                                                                                                                                                                                                                                                                                                                                                                                                                                                                                                                                                                                                                                                                                                                                                                                                                                                                                                                                                                                                                                                                                                    |

## Employment interventions in health settings: systematic review and synthesis – Appendix 1

|                                                                    |                                                                                                                                                                                                                                                                                                                                                                                                                                                                                                                                                                                                                                                                                                                                                  |
|--------------------------------------------------------------------|--------------------------------------------------------------------------------------------------------------------------------------------------------------------------------------------------------------------------------------------------------------------------------------------------------------------------------------------------------------------------------------------------------------------------------------------------------------------------------------------------------------------------------------------------------------------------------------------------------------------------------------------------------------------------------------------------------------------------------------------------|
|                                                                    | (Blankertz and Robinson, 1996; Chang et al., 2016; Ellison et al., 2015; Hoffmann et al., 2014; McGurk et al., 2015, 2005; Ottomanelli et al., 2017; Tan et al., 2016; Waghorn et al., 2015, 2014; Wong et al., 2008)                                                                                                                                                                                                                                                                                                                                                                                                                                                                                                                            |
| Patient-centred services                                           | <i>21 studies</i><br>(Alverson et al., 1995; Becker et al., 2001, 1999; Bejerholm et al., 2017; Bell et al., 2008; Bond et al., 2007; Burt, 2012; Chang et al., 2016; Dresser et al., 2015; Hoffmann et al., 2012, 2014; Howard et al., 2010; Lepage et al., 2013, 2011; Ottomanelli et al., 2017; Poremski et al., 2016, 2015; Sato et al., 2015; Tsang et al., 2009; Waghorn et al., 2015; Zanis and Coviello, 2001)                                                                                                                                                                                                                                                                                                                           |
| <b>2. Patients receive a package of services</b>                   |                                                                                                                                                                                                                                                                                                                                                                                                                                                                                                                                                                                                                                                                                                                                                  |
| Having a dedicated full-time employment specialist or case manager | <i>66 studies</i><br>(Alverson et al., 1995; Au et al., 2015; Becker et al., 2007, 2001, 1999, Bejerholm et al., 2017, 2015, Bell et al., 2014, 2008, Bond et al., 2007, 1995, 2015; Bowie et al., 2016; Burns et al., 2015, 2007; Burns and Catty, 2008; Burt, 2012; Chang et al., 2016; Chiu and Wong, 2001; Chuang et al., 2015; Cook et al., 2005b; Craig et al., 2014; Dresser et al., 2015; Ellison et al., 2015; Gold et al., 2006; Heslin et al., 2011; Hoffmann et al., 2014, 2012; Landolt et al., 2016; Lepage et al., 2013, 2011; LePage et al., 2016; Macias et al., 2006; McCarthy et al., 1998; McGurk et al., 2016, 2005; McGurk and Mueser, 2015; Michon et al., 2014; Morris et al., 2014; Mueser et al., 2004a, 2004b; Oshima |

**Employment interventions in health settings: systematic review and synthesis – Appendix 1**

|                                                                                              |                                                                                                                                                                                                                                                                                                                                                                                                                                                                                                                                                                                                                                                                                                                                                                                                                                                                |
|----------------------------------------------------------------------------------------------|----------------------------------------------------------------------------------------------------------------------------------------------------------------------------------------------------------------------------------------------------------------------------------------------------------------------------------------------------------------------------------------------------------------------------------------------------------------------------------------------------------------------------------------------------------------------------------------------------------------------------------------------------------------------------------------------------------------------------------------------------------------------------------------------------------------------------------------------------------------|
|                                                                                              | et al., 2014; Ottomanelli et al., 2017, 2015, 2014, Poremski et al., 2016, 2015; Porteous and Waghorn, 2007; Reddy et al., 2016; Roush, 2009; Rusch et al., 2014; Sato et al., 2014; Tan et al., 2016; Tsang et al., 2010, 2009, Twamley et al., 2015, 2014; Van Veggel et al., 2015; Waghorn et al., 2015, 2014; Waynor and Gill, 2015; Williams et al., 2015; Wong et al., 2001, 2000, 2008; Zanis and Coviello, 2001)                                                                                                                                                                                                                                                                                                                                                                                                                                       |
| A rapid and competitive job search                                                           | <i>46 studies</i><br>(Becker et al., 2007; Bejerholm et al., 2017, 2015; Bell et al., 2008; Bond et al., 2015, 2014, 2013, 2007, 1995, Burns et al., 2015, 2007; Chiu and Wong, 2001; Cook et al., 2008, 2005a; Ellison et al., 2015; Fraser et al., 2008; Gold et al., 2006; Heslin et al., 2011; Hoffmann et al., 2014; Howard et al., 2010; A. Lehman et al., 2002; LePage et al., 2016; Macias et al., 2006; McGurk et al., 2005; McGurk and Mueser, 2015; Michon et al., 2014; Mueser et al., 2004a, 2004b; Oshima et al., 2014; Ottomanelli et al., 2017, 2015, Poremski et al., 2016, 2015; Porteous and Waghorn, 2007; Puig et al., 2016; Reddy et al., 2016; Sato et al., 2015; Tsang et al., 2010, 2009; Twamley et al., 2014; Van Veggel et al., 2015; Waghorn et al., 2015, 2014; Waynor and Gill, 2015; Williams et al., 2015; Wong et al., 2000) |
| Patients receive ongoing feedback and support. Nine of these articles specifically mentioned | <i>54 studies</i><br>(Alverson et al., 1995; Au et al., 2015; Becker et al., 2007; Bejerholm et al., 2017, 2015, Bell                                                                                                                                                                                                                                                                                                                                                                                                                                                                                                                                                                                                                                                                                                                                          |

## Employment interventions in health settings: systematic review and synthesis – Appendix 1

|                                                                                                                                                                                               |                                                                                                                                                                                                                                                                                                                                                                                                                                                                                                                                                                                                                                                                                                                                                                                                                                                                           |
|-----------------------------------------------------------------------------------------------------------------------------------------------------------------------------------------------|---------------------------------------------------------------------------------------------------------------------------------------------------------------------------------------------------------------------------------------------------------------------------------------------------------------------------------------------------------------------------------------------------------------------------------------------------------------------------------------------------------------------------------------------------------------------------------------------------------------------------------------------------------------------------------------------------------------------------------------------------------------------------------------------------------------------------------------------------------------------------|
| <p>using positive reinforcement, encouragement and hope</p>                                                                                                                                   | <p>et al., 2014, 2008; Blankertz and Robinson, 1996; Bond et al., 1995, 2015, 2007, Burns et al., 2015, 2007; Chang et al., 2016; Chiu and Wong, 2001; Cook et al., 2008, 2005a, 2005b; Craig et al., 2014; Dresser et al., 2015; Ellison et al., 2015; Fuller et al., 2000; Heslin et al., 2011; Hoffmann et al., 2014, 2012; Howard et al., 2010; Landolt et al., 2016; LePage et al., 2016; Lucca et al., 2004; Macias et al., 2006; McGurk et al., 2016, 2009, 2005; McGurk and Mueser, 2015; Michon et al., 2014; Mueser et al., 2004a, 2004b; Oshima et al., 2014; Ottomanelli et al., 2017, 2015, 2014; Pandiani et al., 2004; Poremski et al., 2016, 2015; Porteous and Waghorn, 2007; Roush, 2009; Rusch et al., 2014; Sato et al., 2014; Tan et al., 2016; Tsang et al., 2010, 2009; Van Veggel et al., 2015; Watzke et al., 2009; Wong et al., 2000, 2008)</p> |
| <p>Networking with potential employers</p>                                                                                                                                                    | <p><i>5 studies</i><br/>(Becker et al., 2001; Cook et al., 2005a; Fuller et al., 2000; Van Veggel et al., 2015; Wittich et al., 2013)</p>                                                                                                                                                                                                                                                                                                                                                                                                                                                                                                                                                                                                                                                                                                                                 |
| <p>Education and on-site job training.<br/>Thirteen studies found that specifically developing social competence and coping skills were benefits to patients of employment interventions.</p> | <p><i>47 studies</i><br/>(Au et al., 2015; Becker et al., 2007, 1999; Bejerholm et al., 2017; Bond et al., 2013; Bowie et al., 2016; Burns et al., 2015; Chuang et al., 2015; Cook et al., 2005b; Dresser et al., 2015; Ellison et al., 2015; Hoffmann et al., 2014, 2012; Howard et al., 2010; Kielhofner et al., 2004; Landolt et al., 2016; A. Lehman et al., 2002; Lepage et al., 2013, 2011; LePage et al., 2016; Macias et al., 2006; McGurk et al.,</p>                                                                                                                                                                                                                                                                                                                                                                                                            |

## Employment interventions in health settings: systematic review and synthesis – Appendix 1

|                                                    |                                                                                                                                                                                                                                                                                                                                                                                                                                                                                                                                                                                                                                                                       |
|----------------------------------------------------|-----------------------------------------------------------------------------------------------------------------------------------------------------------------------------------------------------------------------------------------------------------------------------------------------------------------------------------------------------------------------------------------------------------------------------------------------------------------------------------------------------------------------------------------------------------------------------------------------------------------------------------------------------------------------|
|                                                    | 2016, 2015, 2009; Michon et al., 2014; Mueser et al., 2004a, 2004b; Oshima et al., 2014; Ottomanelli et al., 2015; Porteous and Waghorn, 2007; Puig et al., 2016; Reddy et al., 2016; Roush, 2009; Sato et al., 2014; Tan et al., 2016; Tsang et al., 2016, 2010, 2009, Twamley et al., 2015, 2014; Waghorn et al., 2015; Watzke et al., 2009; Wittich et al., 2013; Wong et al., 2001, 2000, 2008; Zanis and Coviello, 2001)                                                                                                                                                                                                                                         |
| Peer network and supports                          | <i>13 studies</i><br>(Alverson et al., 1995; Becker et al., 2007; Bell et al., 2014; Blankertz and Robinson, 1996; Bowie et al., 2016; Ellison et al., 2015; LePage et al., 2016; McGurk et al., 2016; Roush, 2009; Tan et al., 2016; Tsang et al., 2009; Waghorn et al., 2015; Wittich et al., 2013)                                                                                                                                                                                                                                                                                                                                                                 |
| <b>3. The services are one-on-one and tailored</b> |                                                                                                                                                                                                                                                                                                                                                                                                                                                                                                                                                                                                                                                                       |
| One-on-one services                                | <i>40 studies</i><br>(Au et al., 2015; Becker et al., 2007; Bejerholm et al., 2017, 2015; Blankertz and Robinson, 1996; Bond et al., 2015, 2007, 1995, Burns et al., 2015, 2007; Chiu and Wong, 2001; Chuang et al., 2015; Craig et al., 2014; Dresser et al., 2015; Ellison et al., 2015; Hoffmann et al., 2014, 2012; Landolt et al., 2016; Lepage et al., 2011; LePage et al., 2016; McCarthy et al., 1998; McGurk et al., 2016, 2015, 2005; Mueser et al., 2004b; Ottomanelli et al., 2017, 2015, Poremski et al., 2016, 2015; Porteous and Waghorn, 2007; Reddy et al., 2016; Roush, 2009; Sato et al., 2014; Tsang et al., 2010, 2009; Van Veggel et al., 2015; |



## Employment interventions in health settings: systematic review and synthesis – Appendix 1

|                                                                                                   |                                                                                                                                                                                                                                                                                                                                                                                                                                                                                                                                                                                                                                                                                                                                                                                                                                                                    |
|---------------------------------------------------------------------------------------------------|--------------------------------------------------------------------------------------------------------------------------------------------------------------------------------------------------------------------------------------------------------------------------------------------------------------------------------------------------------------------------------------------------------------------------------------------------------------------------------------------------------------------------------------------------------------------------------------------------------------------------------------------------------------------------------------------------------------------------------------------------------------------------------------------------------------------------------------------------------------------|
|                                                                                                   | Williams et al., 2015; Wong et al., 2001, 2000, 2008)                                                                                                                                                                                                                                                                                                                                                                                                                                                                                                                                                                                                                                                                                                                                                                                                              |
| Services are tailored to patients job preferences, skills, education and previous work experience | <i>50 studies</i><br>(Au et al., 2015; Becker et al., 2007, 1996, Bejerholm et al., 2017, 2015; Blankertz and Robinson, 1996; Bond et al., 1995, 2015, 2013, 2007, Burns et al., 2015, 2007; Chiu and Wong, 2001; Chuang et al., 2015; Cohen et al., 2010; Cook et al., 2008, 2005a; Dresser et al., 2015; Ellison et al., 2015; Heslin et al., 2011; Hoffmann et al., 2014, 2012; Howard et al., 2010; Landolt et al., 2016; A. F. Lehman et al., 2002; LePage et al., 2016; McCarthy et al., 1998; McGurk et al., 2016, 2015, 2009, 2005, Mueser et al., 2004a, 2004b; Oshima et al., 2014; Ottomanelli et al., 2017, 2015, 2014, Poremski et al., 2016, 2015; Porteous and Waghorn, 2007; Sato et al., 2014; Tsang et al., 2010, 2009, Twamley et al., 2015, 2014; Waynor and Gill, 2015; Williams et al., 2015; Wittich et al., 2013; Wong et al., 2000, 2008) |
| <b>4. The services are holistic and take a comprehensive view of social needs</b>                 |                                                                                                                                                                                                                                                                                                                                                                                                                                                                                                                                                                                                                                                                                                                                                                                                                                                                    |
| Address the social determinants of health                                                         | <i>8 studies</i><br>(Bond et al., 2015; Kielhofner et al., 2004; McGurk et al., 2009; Mueser et al., 2004b; Poremski et al., 2016, 2015; Sato et al., 2014; Tan et al., 2016)                                                                                                                                                                                                                                                                                                                                                                                                                                                                                                                                                                                                                                                                                      |
| Bring the social determinants of health to the forefront of primary care                          | <i>4 studies</i><br>(Burt, 2012; Chang et al., 2016; Marwaha et al., 2014; Ottomanelli et al., 2012)                                                                                                                                                                                                                                                                                                                                                                                                                                                                                                                                                                                                                                                                                                                                                               |
| <b>5. The intervention team works with and engages employers</b>                                  |                                                                                                                                                                                                                                                                                                                                                                                                                                                                                                                                                                                                                                                                                                                                                                                                                                                                    |

## Employment interventions in health settings: systematic review and synthesis – Appendix 1

|                                                                     |                                                                                                                                                                                                            |
|---------------------------------------------------------------------|------------------------------------------------------------------------------------------------------------------------------------------------------------------------------------------------------------|
| Employers received support and education from the intervention team | <i>9 studies</i><br>(Bejerholm et al., 2017, 2015; Burns et al., 2007; Fuller et al., 2000; Hoffmann et al., 2012; Kielhofner et al., 2004; Tan et al., 2016; Waghorn et al., 2015; Williams et al., 2015) |
| Employer buy-in and incentives                                      | <i>6 studies</i><br>(Fuller et al., 2000; Hoffmann et al., 2014, 2012; Howard et al., 2010; LePage et al., 2016; Tan et al., 2016)                                                                         |
| Employers provide accommodations to employees                       | <i>5 studies</i><br>(Bejerholm et al., 2017; Bond et al., 1995; LePage et al., 2016; Ottomanelli et al., 2015; Tan et al., 2016)                                                                           |
